# Supplementary material
Source: Royal Society of Chemistry journal article supplement (doi:10.1039/d5em01075f)
Supplement: d5em01075f1.pdf [file d5em01075f1.pdf]

*Supporting Information*

**Per- and Polyfluoroalkyl Substances in E-Waste Dust**

Chunjie Xia,<sup>1</sup> William A. Stubbings,<sup>2</sup> Linh V. Nguyen,<sup>3</sup> Kevin Romanak,<sup>1</sup> Liisa Jantunen,<sup>4</sup> Lisa Melymuk,<sup>5,7</sup> Victoria Arrandale,<sup>6,3</sup> Miriam L. Diamond,<sup>7,8</sup> Marta Venier<sup>1,\*</sup>

<sup>1</sup>O'Neill School of Public and Environmental Affairs, Indiana University, Bloomington, IN

<sup>2</sup>Geography, Earth and Environmental Sciences, University of Birmingham, Birmingham, UK

<sup>3</sup>Occupational Cancer Research Centre, Ontario Health, Ontario, Canada

<sup>4</sup>Air Quality Processes Research Section, Environment and Climate Change Canada, Egbert, Ontario, Canada

<sup>5</sup>RECETOX, Faculty of Science, Masaryk University, Brno, Czech Republic

<sup>6</sup>Dalla Lana School of Public Health, University of Toronto, Ontario, Canada

<sup>7</sup>Department of Earth Sciences, University of Toronto, Toronto, Ontario Canada

<sup>8</sup>School of the Environment, University of Toronto, Toronto, Ontario, Canada

Number of pages: 28

Number of tables: 14

Number of texts: 1

\* Corresponding author: Marta Venier. Email: [mvenier@iu.edu](mailto:mvenier@iu.edu); Phone: +1-(812) 855-1005

## Text S1 Materials and Methods

**Table S1** E-waste sample information

| Sample ID | Facility ID | Sample collection location |
|-----------|-------------|----------------------------|
| S1        | 1           | Bin-1                      |
| S2        | 1           | Bench-1                    |
| S3        | 1           | Bin-2                      |
| S4        | 1           | Floor-1                    |
| S5        | 2           | Floor-2                    |
| S6        | 1           | Bench-2                    |
| S7        | 1           | Floor-3                    |
| S8        | 1           | Bench-3                    |
| S9        | 1           | Floor-4                    |
| S10       | 1           | Floor-5                    |
| S11       | 1           | Floor-6                    |
| S12       | 1           | Floor-7                    |
| S13       | 1           | Bin-3                      |
| S14       | 1           | Bin-4                      |
| S15       | 1           | Bin-5                      |
| S16       | 1           | Bench-4                    |
| S17       | 1           | Floor-8                    |
| S18       | 1           | Floor-9                    |
| S19       | 1           | Composite                  |

**Table S2.** List of PFAS analytes including abbreviation, CAS number and full name. SS and IS represent surrogate and internal standard, respectively.

| Abbr.  | CAS #     | Formula                                         | Compound name               |
|--------|-----------|-------------------------------------------------|-----------------------------|
| TFA    | 76-05-1   | C <sub>2</sub> HF <sub>3</sub> O <sub>2</sub>   | Trifluoroacetic acid        |
| PFPrA  | 422-64-0  | C <sub>3</sub> HF <sub>5</sub> O <sub>2</sub>   | Perfluoropropanoic acid     |
| PFBA   | 375-22-4  | C <sub>4</sub> HF <sub>7</sub> O <sub>2</sub>   | Perfluorobutanoic acid      |
| PFPeA  | 2706-90-3 | C <sub>5</sub> HF <sub>9</sub> O <sub>2</sub>   | Perfluoropentanoic acid     |
| PFHxA  | 307-24-4  | C <sub>6</sub> HF <sub>11</sub> O <sub>2</sub>  | Perfluoro-n-hexanoic acid   |
| PFHpA  | 375-85-9  | C <sub>7</sub> HF <sub>13</sub> O <sub>2</sub>  | Perfluoro-n-heptanoic acid  |
| PFOA   | 335-67-1  | C <sub>8</sub> HF <sub>15</sub> O <sub>2</sub>  | Perfluoro-n-octanoic acid   |
| PFNA   | 375-95-1  | C <sub>9</sub> HF <sub>17</sub> O <sub>2</sub>  | Perfluoro-n-nonanoic acid   |
| PFDA   | 335-76-2  | C <sub>10</sub> HF <sub>19</sub> O <sub>2</sub> | Perfluoro-n-decanoic acid   |
| PFUnDA | 2058-94-8 | C <sub>11</sub> HF <sub>21</sub> O <sub>2</sub> | Perfluoro-n-undecanoic acid |
| PFDoDA | 307-55-1  | C <sub>12</sub> HF <sub>23</sub> O <sub>2</sub> | Perfluoro-n-dodecanoic acid |

|              |             |                        |                                                    |
|--------------|-------------|------------------------|----------------------------------------------------|
| PFTrDA       | 72629-94-8  | $C_{13}HF_{25}O_2$     | Perfluoro-n-tridecanoic acid                       |
| PFTeDA       | 376-06-7    | $C_{14}HF_{27}O_2$     | Perfluoro-n-tetradecanoic acid                     |
| PFHxDA       | 67905-19-5  | $C_{16}HF_{31}O_2$     | Perfluoro-n-hexadecanoic acid                      |
| TFMS         | 1493-13-6   | $CHF_3SO_3$            | Trifluoromethanesulfonic acid                      |
| PFEtS        | 354-88-1    | $C_2HF_5SO_3$          | perfluoroethanesulfonic acid                       |
| PFPrS        | 423-41-6    | $C_3HF_7SO_3$          | Perfluoro-1-propanesulfonic acid                   |
| PFBS         | 375-73-5    | $C_4HF_9SO_3$          | Perfluoro-1-butanesulfonic acid                    |
| PFPeS        | 2706-91-4   | $C_5HF_{11}SO_3$       | Perfluoro-1-pentanesulfonic acid                   |
| PFHxS        | 355-46-4    | $C_6HF_{13}SO_3$       | Perfluoro-1-hexanesulfonic acid                    |
| PFHpS        | 375-92-8    | $C_7HF_{15}SO_3$       | Perfluoro-1-heptanesulfonic acid                   |
| PFOS         | 1763-23-1   | $C_8HF_{17}SO_3$       | Perfluoro-1-octanesulfonic acid                    |
| PFNS         | 68259-12-1  | $C_9HF_{19}SO_3$       | Perfluoro-1-nonanesulfonic acid                    |
| PFDS         | 335-77-3    | $C_{10}HF_{21}SO_3$    | Perfluoro-1-decanesulfonic acid                    |
| PFECHS       | 646-83-3    | $C_8HF_{15}SO_3$       | Perfluoro-4-ethylcyclohexanesulfonic acid          |
| Cl-PFOS      | 777011-38-8 | $C_8HF_{16}ClSO_3$     | 8-Chloroperfluoro-1-octanesulfonic acid            |
| FBSA         | 30334-69-1  | $C_4H_2F_9NO_2S$       | Perfluoro-1-butanesulfonamide                      |
| FHxSA        | 41997-13-1  | $C_6H_2F_{13}NO_2S$    | Perfluoro-1-hexanesulfonamide                      |
| FOSA         | 754-91-6    | $C_8H_2F_{17}NO_2S$    | Perfluoro-1-octanesulfonamide                      |
| MeFOSA       | 31506-32-8  | $C_9H_4F_{17}NO_2S$    | N-methylperfluoro-1-octanesulfonamide              |
| EtFOSA       | 4151-50-2   | $C_{10}H_6F_{17}NO_2S$ | N-ethylperfluoro-1-octanesulfonamide               |
| 6:2 Cl-PFESA | 756426-58-1 | $C_8HClF_{16}O_4S$     | 9-Chlorohexadecafluoro-3-oxanonane-1-sulfonate     |
| 8:2 Cl-PFESA | 763051-92-9 | $C_{10}HClF_{20}O_4S$  | 11-Chloroeicosafluoro-3-oxaundecane-1-sulfonate    |
| 4:2 FTSA     | 757124-72-4 | $C_6H_5F_9O_3S$        | 1H,1H,2H,2H-perfluorohexane sulfonic acid (4:2)    |
| 6:2 FTSA     | 27619-97-2  | $C_8H_5F_{13}O_3S$     | 1H,1H,2H,2H-perfluorooctane sulfonic acid (6:2)    |
| 8:2 FTSA     | 39108-34-4  | $C_{10}H_5F_{17}O_3S$  | 1H,1H,2H,2H-perfluorodecane sulfonic acid (8:2)    |
| 10:2 FTSA    | 120226-60-0 | $C_{12}H_5F_{21}O_3S$  | 1H,1H,2H,2H-Perfluorododecanesulphonic acid (10:2) |
| FPrPA        | 356-02-5    | $C_6F_7H_5O_2$         | 3-Perfluoropropyl propanoic acid(3:3)              |
| FPePA        | 914637-49-3 | $C_8F_{11}H_5O_2$      | 3-Perfluoropentyl propanoic acid(5:3)              |
| FHpPA        | 812-70-4    | $C_{10}F_{15}H_5O_2$   | 3-Perfluoroheptyl propanoic acid(7:3)              |
| FOPA         | 34598-33-9  | $C_{11}F_{17}H_5O_2$   | 3-Heptadecafluorooctyl propanoic acid(8:3)         |
| FOSAA        | 2806-24-8   | $C_{10}F_{17}H_4NSO_4$ | Perfluorooctane sulfonamido acetic acid            |
| N-MeFOSAA    | 2355-31-9   | $C_{11}F_{17}H_6NSO_4$ | N-methylperfluorooctane sulfonamidoacetic acid     |
| N-EtFOSAA    | 2991-50-6   | $C_{12}F_{17}H_8NSO_4$ | N-Ethylperfluorooctane sulfonamidoacetic acid      |
| 6:2 FTUCA    | 70887-88-6  | $C_8F_{12}H_2O_2$      | 3-(Perfluoropentyl)-3-fluoro-2-propenoic acid      |
| 8:2 FTUCA    | 70887-84-2  | $C_{10}F_{16}H_2O_2$   | 2H-Perfluoro-2-decenoic acid                       |
| 10:2 FTUCA   | 70887-94-4  | $C_{12}F_{20}H_2O_2$   | 2H-Perfluoro-2-dodecenoate                         |
| 6:6 PFPiA    | 40143-77-9  | $C_{12}F_{26}HO_2P$    | Bis(perfluorohexyl)phosphinic acid                 |
| 6:8 PFPiA    | 610800-34-5 | $C_{14}F_{30}HO_2P$    | Bis(perfluorohexyloctyl)phosphinic acid            |

|                        |                               |                               |                                                                       |
|------------------------|-------------------------------|-------------------------------|-----------------------------------------------------------------------|
| 8:8 PFPiA              | 40143-79-1                    | $C_{16}F_{34}HO_2P$           | Bis(perfluorooctyl)phosphinic acid                                    |
| PFH <sub>x</sub> PA    | 40143-76-8                    | $C_6F_{13}H_2O_3P$            | Perfluorohexanephosphonic acid                                        |
| PFOPA                  | 40143-78-0                    | $C_8F_{17}H_2O_3P$            | Perfluorooctylphosphonic acid                                         |
| PFDPA                  | 52299-26-0                    | $C_{10}F_{21}H_2O_3P$         | Perfluorodecylphosphonic acid                                         |
| PFMPA                  | 377-73-1                      | $C_4HF_7O_3$                  | Perfluoro-3-methoxypropanoic acid                                     |
| PFMBA                  | 863090-89-5                   | $C_5HF_9O_3$                  | Perfluoro-4-methoxybutanoic acid                                      |
| NFDHA                  | 151772-58-6                   | $C_5HF_9O_4$                  | Nonafluoro-3,6-dioxaheptanoic acid                                    |
| ADONA                  | 919005-14-4                   | $C_7H_2F_{12}O_4$             | 4,8-Dioxa-3H-perfluorononanoic acid                                   |
| PFEESA                 | 113507-82-7                   | $C_4HF_9SO_4$                 | Perfluoro(2-ethoxyethane)sulphonic acid                               |
| HFPO-TA                | 13252-14-7                    | $C_9HF_{17}O_4$               | Perfluoro-2,5-dimethyl-3,6-dioxanonanoic acid                         |
| P3MHpS/<br>P6MHpS      | 1202827-34-6                  | $C_8HF_{17}SO_3$              | Perfluoro-3/6-methylheptane sulfonate                                 |
| P7MOS                  | 1202827-35-7                  | $C_9HF_{19}SO_3$              | Perfluoro-7-methyloctanesulfonate                                     |
| P3MHpA                 | 1202827-30-2                  | $C_8HF_{15}O_2$               | Perfluoro-3-methylheptanoic acid                                      |
| P4MOA/P7MOA            | 1202827-31-3<br>/1202827-32-4 | $C_9HF_{17}O_2$               | Perfluoro-4/7-methyloctanoic acid                                     |
| P355TMHxA              | 1202827-33-5                  | $C_9HF_{17}O_2$               | Perfluoro-3,5,5-trimethylhexanoic acid                                |
| P37DMOA                | 1202827-36-8                  | $C_{10}HF_{19}O_2$            | Perfluoro-3,7-dimethyloctanoic acid                                   |
| $^{13}C_2$ -TFA (SS)   |                               | $NaF_3O_2 + ^{13}C_2$         | Sodium trifluoroacetate                                               |
| $^{13}C_3$ -PFPrA (SS) |                               | $HF_5O_2 + ^{13}C_3$          | Perfluoro-n-[1,2,3- $^{13}C_3$ ]propanoic acid                        |
| M3PFBA (SS)            |                               | $CHF_7O_2 + ^{13}C_3$         | Perfluoro-n-[2,3,4- $^{13}C_3$ ]butanoic acid                         |
| MPFHxA (SS)            |                               | $C_4HF_{11}O_2 + ^{13}C_2$    | Perfluoro-n-[1,2- $^{13}C_2$ ]hexanoic acid                           |
| MPFOA (SS)             |                               | $C_4HF_{15}O_2 + ^{13}C_4$    | Perfluoro-n-[1,2,3,4- $^{13}C_4$ ]octanoic acid                       |
| MPFUnDA (SS)           |                               | $C_9HF_{21}O_2 + ^{13}C_2$    | Perfluoro-n-[1,2- $^{13}C_2$ ]undecanoic acid                         |
| M2PFTeDA (SS)          |                               | $C_{12}HF_{27}O_2 + ^{13}C_2$ | Perfluoro-n-[1,2- $^{13}C_2$ ]tetradecanoic acid                      |
| M3PFBS (SS)            |                               | $CHF_9SO_3 + ^{13}C_3$        | Perfluoro-1-[2,3,4- $^{13}C_3$ ]butanesulfonic acid                   |
| MPFHxS (SS)            |                               | $C_6HF_{13}SO + ^{18}O_2$     | Perfluoro-1-hexane[ $^{18}O_2$ ]sulfonic acid                         |
| MPFOS (SS)             |                               | $C_4HF_{17}SO_3 + ^{13}C_4$   | Perfluoro-1-[1,2,3,4- $^{13}C_4$ ]octanesulfonic acid                 |
| dMeFOSA (SS)           |                               | $C_8F_{17}SO_2N+D_3$          | N-methyl-d <sub>3</sub> -perfluoro-1-octanesulfonamide                |
| M2-8:2 FTSA (SS)       |                               | $C_8H_5F_{17}O_3S + ^{13}C_2$ | 1H,1H,2H,2H-perfluoro-1-[1,2- $^{13}C_2$ ]-decane sulfonic acid (8:2) |
| MPFBA (IS)             |                               | $HF_7O_2 + ^{13}C_4$          | Perfluoro-n-[1,2,3,4- $^{13}C_4$ ]butanoic acid                       |
| M8PFOA (IS)            |                               | $HF_{15}O_2 + ^{13}C_8$       | Perfluoro-n-[ $^{13}C_8$ ]octanoic acid                               |
| M7PFUnDA (IS)          |                               | $C_4HF_{21}O_2 + ^{13}C_7$    | Perfluoro-n-[1,2,3,4,5,6,7- $^{13}C_7$ ]undecanoic acid               |
| M3PFHxS (IS)           |                               | $C_3HF_{13}SO_3 + ^{13}C_3$   | Perfluoro-1-[1,2,3- $^{13}C_3$ ]hexanesulfonic acid                   |
| M8PFOS (IS)            |                               | $HF_{17}SO_3 + ^{13}C_8$      | Perfluoro-[ $^{13}C_8$ ]octanesulfonic acid                           |
| 6:2 diPAP              | 57677-95-9                    | $C_{16}H_9F_{26}O_4P$         | Bis(1H,1H,2H,2H-perfluorooctyl)phosphate                              |
| 6:2/8:2 diPAP          | 943913-15-3                   | $C_{18}H_9F_{30}O_4P$         | (1H,1H,2H,2H-perfluorooctyl)-1H,1H,2H,2H-                             |

|                      |             |                                                                                                                |                                                                                                                                                                       |
|----------------------|-------------|----------------------------------------------------------------------------------------------------------------|-----------------------------------------------------------------------------------------------------------------------------------------------------------------------|
| 8:2 diPAP            | 678-41-1    | C <sub>20</sub> H <sub>9</sub> F <sub>34</sub> O <sub>4</sub> P                                                | perfluorodecyl)phosphate                                                                                                                                              |
| 10:2 diPAP           | 1895-26-7   | C <sub>24</sub> H <sub>9</sub> F <sub>42</sub> O <sub>4</sub> P                                                | Bis(1H,1H,2H,2H-perfluorodecyl)phosphate                                                                                                                              |
| diSAmPAP             | 88806-20-4  | C <sub>20</sub> H <sub>18</sub> F <sub>16</sub> N <sub>2</sub> O <sub>6</sub><br>P <sub>2</sub> S <sub>2</sub> | Bis[2-(perfluorodecyl)ethyl] phosphate                                                                                                                                |
| 6:2 triPAP           | 165325-62-2 | C <sub>24</sub> H <sub>12</sub> F <sub>39</sub> O <sub>4</sub> P                                               | N,N'-Bis[2-(perfluorooctane<br>sulfonamido)ethyl]phosphoric acid                                                                                                      |
| M4-8:2 diPAP<br>(SS) |             | C <sub>16</sub> H <sub>9</sub> F <sub>34</sub> O <sub>4</sub> P +<br><sup>13</sup> C <sub>4</sub>              | Tris[2-(perfluorohexyl)ethyl] Phosphate                                                                                                                               |
| M4-6:2 diPAP (IS)    |             | C <sub>12</sub> H <sub>7</sub> F <sub>25</sub> O <sub>6</sub> P +<br><sup>13</sup> C <sub>4</sub>              | Bis(1H,1H,2H,2H-[1,2-<br><sup>13</sup> C <sub>2</sub> ]perfluorodecyl)phosphate                                                                                       |
| 4:2 FTOH             | 2043-47-2   | C <sub>6</sub> H <sub>5</sub> F <sub>9</sub> O                                                                 | Bis(1H,1H,2H,2H-[1,2-<br><sup>13</sup> C <sub>2</sub> ]perfluorooctyl)phosphate                                                                                       |
| 6:2 FTOH             | 647-42-7    | C <sub>8</sub> H <sub>5</sub> F <sub>13</sub> O                                                                | 2-Perfluorobutyl ethanol (4:2)                                                                                                                                        |
| 8:2 FTOH             | 678-39-7    | C <sub>10</sub> H <sub>5</sub> F <sub>17</sub> O                                                               | 2-Perfluorohexyl ethanol (6:2)                                                                                                                                        |
| 10:2 FTOH            | 865-86-1    | C <sub>12</sub> H <sub>5</sub> F <sub>21</sub> O                                                               | 2-Perfluorooctyl ethanol (8:2)                                                                                                                                        |
| 6:2 FTAC             | 17527-29-6  | C <sub>11</sub> H <sub>7</sub> F <sub>13</sub> O <sub>2</sub>                                                  | 2-Perfluorodecyl ethanol (10:2)                                                                                                                                       |
| 8:2 FTAC             | 27905-45-9  | C <sub>13</sub> H <sub>7</sub> F <sub>17</sub> O <sub>2</sub>                                                  | 1H,1H,2H,2H-perfluorooctyl acrylate                                                                                                                                   |
| 10:2 FTAC            | 17741-60-5  | C <sub>15</sub> H <sub>7</sub> F <sub>21</sub> O <sub>2</sub>                                                  | 1H,1H,2H,2H-Perfluorodecyl acrylate                                                                                                                                   |
| 6:2 FTMAC            | 2144-53-8   | C <sub>12</sub> H <sub>9</sub> F <sub>13</sub> O <sub>2</sub>                                                  | 1H,1H,2H,2H-Perfluorododecyl acrylate                                                                                                                                 |
| 8:2 FTMAC            | 1996-88-9   | C <sub>14</sub> H <sub>9</sub> F <sub>17</sub> O <sub>2</sub>                                                  | 1H,1H,2H,2H-perfluorooctyl methacrylate                                                                                                                               |
| MeFOSE               | 24448-09-7  | C <sub>11</sub> H <sub>8</sub> F <sub>17</sub> NO <sub>2</sub> S                                               | 1H,1H,2H,2H-heptadecafluorodecyl<br>methacrylate                                                                                                                      |
| EtFOSE               | 1691-99-2   | C <sub>12</sub> H <sub>10</sub> F <sub>17</sub> NO <sub>2</sub> S                                              | 2-(N-methylperfluoro-1-octanesulfonamido)-<br>ethanol                                                                                                                 |
| MeFBSE               | 34454-97-2  | C <sub>7</sub> H <sub>8</sub> F <sub>9</sub> NO <sub>3</sub> S                                                 | 2-(N-ethylperfluoro-1-octanesulfonamido)-<br>ethanol                                                                                                                  |
| EtFBSE               | 34449-89-3  | C <sub>8</sub> H <sub>10</sub> F <sub>9</sub> NO <sub>3</sub> S                                                | 1-Butanesulfonamide, 1,1,2,2,3,3,4,4,4-<br>nonafluoro-N-(2-hydroxyethyl)-N-methyl-<br>N-ethyl-1,1,2,2,3,3,4,4,4-nonafluoro-N-(2-<br>hydroxyethyl)butane-1-sulfonamide |
| 8:2 FTOAc            | 37858-04-1  | C <sub>12</sub> H <sub>7</sub> F <sub>17</sub> O <sub>2</sub>                                                  | 1H,1H,2H,2H-Heptadecafluorodecyl acetate                                                                                                                              |
| 10:2 FTOAc           | 37858-05-2  | C <sub>14</sub> H <sub>7</sub> F <sub>21</sub> O <sub>2</sub>                                                  | 1H,1H,2H,2H-Perfluorododecyl acetate                                                                                                                                  |
| PCBTF                | 98-56-6     | C <sub>7</sub> H <sub>4</sub> ClF <sub>3</sub>                                                                 | Parachlorobenzotrifluoride                                                                                                                                            |
| M4-4:2 FTOH<br>(SS)  |             | C <sub>6</sub> HF <sub>9</sub> O + D <sub>4</sub>                                                              | 2-Perfluorobutyl-[1,1,2,2- <sup>2</sup> H <sub>4</sub> ]-ethanol (4:2)                                                                                                |
| M2-8:2 FTOH<br>(SS)  |             | C <sub>8</sub> H <sub>5</sub> F <sub>17</sub> O +<br><sup>13</sup> C <sub>2</sub>                              | 2-Perfluorooctyl-[1,2- <sup>13</sup> C <sub>2</sub> ]-ethanol (8:2)                                                                                                   |
| dMeFOSE (SS)         |             | C <sub>11</sub> H <sub>1</sub> F <sub>17</sub> NO <sub>3</sub> S<br>+ D <sub>7</sub>                           | 2-(N-methyl-d <sub>3</sub> -perfluoro-1-<br>octanesulfonamido)ethan-d <sub>4</sub> -ol                                                                                |
| M4-8:2 FTOH (IS)     |             | C <sub>8</sub> H <sub>3</sub> F <sub>17</sub> O +<br><sup>13</sup> C <sub>2</sub> D <sub>2</sub>               | 2-Perfluorooctyl-[1,1- <sup>2</sup> H <sub>2</sub> ]-[1,2- <sup>13</sup> C <sub>2</sub> ]-ethanol<br>(8:2)                                                            |

**Table S3.** Surrogate standards (SS) and internal standards (IS) used to calculate PFAS concentrations. Surrogates were used as general indicators of overall analytical quality (i.e., recoveries) during the entire analytical process, and internal standards were used for quantitation for both SS and targeted compounds.

| Native PFAS | SS for correction | IS for quantitation | SS | IS for quantitation |
|-------------|-------------------|---------------------|----|---------------------|
|-------------|-------------------|---------------------|----|---------------------|

| <b>Native PFAS</b>  | <b>SS for correction</b>            | <b>IS for quantitation</b> | <b>SS</b>                           | <b>IS for quantitation</b> |
|---------------------|-------------------------------------|----------------------------|-------------------------------------|----------------------------|
| TFA                 | <sup>13</sup> C <sub>2</sub> -TFA   | MPFBA                      | <sup>13</sup> C <sub>2</sub> -TFA   | MPFBA                      |
| PFPrA               | <sup>13</sup> C <sub>3</sub> -PFPrA | MPFBA                      | <sup>13</sup> C <sub>3</sub> -PFPrA | MPFBA                      |
| PFPrA               | M3PFBA                              | MPFBA                      | M3PFBA                              | MPFBA                      |
| PFBA                | M3PFBA                              | MPFBA                      | MPFHxA                              | M8PFOA                     |
| PFPeA               | M3PFBA                              | MPFBA                      | MPFOA                               | M8PFOA                     |
| PFHxA               | MPFHxA                              | M8PFOA                     | MPFUnDA                             | M7PFUnDA                   |
| PFHpA               | MPFHxA                              | M8PFOA                     | M2PFTeDA                            | M7PFUnDA                   |
| PFOA                | MPFOA                               | M8PFOA                     | M3PFBS                              | M3PFHxS                    |
| PFNA                | MPFOA                               | M8PFOA                     | MPFHxS                              | M3PFHxS                    |
| PFDA                | MPFUnDA                             | M7PFUnDA                   | MPFOS                               | M8PFOS                     |
| PFUnDA              | MPFUnDA                             | M7PFUnDA                   | M2-8:2 FTSA                         | M8PFOS                     |
| PFD <sub>o</sub> DA | M2PFTeDA                            | M7PFUnDA                   | dMeFOSA                             | M8PFOS                     |
| PFT <sub>r</sub> DA | M2PFTeDA                            | M7PFUnDA                   | M4-4:2 FTOH                         | M4-8:2 FTOH                |
| PFTeDA              | M2PFTeDA                            | M7PFUnDA                   | M2-8:2 FTOH                         | M4-8:2 FTOH                |
| PFHxDA              | M2PFTeDA                            | M7PFUnDA                   | dMeFOSE                             | d9-d9-EtFOSE               |
| TFMS                | M3PFBS                              | M3PFHxS                    | M4-8:2 diPAP                        | M4-6:2 diPAP               |
| PFEtS               | M3PFBS                              | M3PFHxS                    |                                     |                            |
| PFPrS               | M3PFBS                              | M3PFHxS                    |                                     |                            |
| PFBS                | M3PFBS                              | M3PFHxS                    |                                     |                            |
| PFPeS               | MPFHxS                              | M3PFHxS                    |                                     |                            |
| PFHxS               | MPFHxS                              | M3PFHxS                    |                                     |                            |
| PFHpS               | MPFOS                               | M3PFHxS                    |                                     |                            |
| PFOS                | MPFOS                               | M8PFOS                     |                                     |                            |
| PFNS                | MPFOS                               | M8PFOS                     |                                     |                            |
| PFDS                | MPFOS                               | M8PFOS                     |                                     |                            |
| PFECHS              | MPFOS                               | M8PFOS                     |                                     |                            |
| Cl-PFOS             | MPFOS                               | M8PFOS                     |                                     |                            |
| FBSA                | M3PFBS                              | M3PFHxS                    |                                     |                            |
| FHxSA               | MPFHxS                              | M3PFHxS                    |                                     |                            |
| FOSA                | MPFOS                               | M8PFOS                     |                                     |                            |
| MeFOSA              | dMeFOSA                             | M8PFOS                     |                                     |                            |
| EtFOSA              | dMeFOSA                             | M8PFOS                     |                                     |                            |
| 4:2 FTSA            | M2-8:2 FTS                          | M3PFHxS                    |                                     |                            |
| 6:2 FTSA            | M2-8:2 FTS                          | M3PFHxS                    |                                     |                            |
| 8:2 FTSA            | M2-8:2 FTS                          | M8PFOS                     |                                     |                            |
| 10: 2 FTSA          | M2-8:2 FTS                          | M8PFOS                     |                                     |                            |
| FPrPA               | M3PFBA                              | MPFBA                      |                                     |                            |
| FPePA               | MPFOA                               | M8PFOA                     |                                     |                            |
| FHpPA               | MPFOA                               | M8PFOA                     |                                     |                            |
| FOPA                | MPFUnDA                             | M7PFUnDA                   |                                     |                            |
| FOSAA               | MPFUnDA                             | M8PFOS                     |                                     |                            |
| N-MeFOSAA           | MPFUnDA                             | M8PFOS                     |                                     |                            |
| N-EtFOSAA           | MPFUnDA                             | M8PFOS                     |                                     |                            |
| 6:2 FTUCA           | MPFOA                               | M8PFOA                     |                                     |                            |
| 8:2 FTUCA           | MPFOA                               | M8PFOA                     |                                     |                            |

| Native PFAS       | SS for correction | IS for quantitation | SS | IS for quantitation |
|-------------------|-------------------|---------------------|----|---------------------|
| 10:2 FTUCA        | MPFUnDA           | M7PFUnDA            |    |                     |
| 6:6 PFPiA         | MPFUnDA           | M7PFUnDA            |    |                     |
| 6:8 PFPiA         | MPFUnDA           | M7PFUnDA            |    |                     |
| 8:8 PFPiA         | MPFUnDA           | M7PFUnDA            |    |                     |
| PFHxPA            | M3PFBA            | MPFBA               |    |                     |
| PFOPA             | MPFHxA            | M8PFOA              |    |                     |
| PFDPA             | MPFUnDA           | M7PFUnDA            |    |                     |
| PFMPA             | M3PFBA            | MPFBA               |    |                     |
| PFMBA             | M3PFBA            | MPFBA               |    |                     |
| NFDHA             | MPFHxA            | M8PFOA              |    |                     |
| ADONA             | MPFOA             | M8PFOA              |    |                     |
| PFEESA            | MPFHxA            | M8PFOS              |    |                     |
| GenX              | MPFHxA            | M8PFOA              |    |                     |
| HFPO-TA           | MPFUnDA           | M8PFOA              |    |                     |
| P3MHpS/<br>P6MHpS | MPFOS             | M8PFOS              |    |                     |
| P7MOS             | MPFOS             | M8PFOS              |    |                     |
| P3MHpA            | MPFOA             | M8PFOA              |    |                     |
| P4MOA/<br>P7MOA   | MPFOA             | M8PFOA              |    |                     |
| P355TMHxA         | MPFOA             | M8PFOA              |    |                     |
| P37DMOA           | MPFUnDA           | M8PFOA              |    |                     |
| 6:2 diPAP         | M4-8:2 diPAP      | M4-6:2 diPAP        |    |                     |
| 6:2/8:2 diPAP     | M4-8:2 diPAP      | M4-6:2 diPAP        |    |                     |
| 8:2 diPAP         | M4-8:2 diPAP      | M4-6:2 diPAP        |    |                     |
| 10:2 diPAP        | M4-8:2 diPAP      | M4-6:2 diPAP        |    |                     |
| diSAmPAP          | M4-8:2 diPAP      | M4-6:2 diPAP        |    |                     |
| 6:2 triPAP        | M4-8:2 diPAP      | M4-6:2 diPAP        |    |                     |

**Table S4.** Molar yield of PFCAs from the oxidation of M-2 8:2 FTS using the dTOP protocol employed for all the samples.

| Molar Yields/% | PFPrA      | PFBA       | PFPeA     | PFHxA      | PFHpA      | PFOA       | PFNA      |
|----------------|------------|------------|-----------|------------|------------|------------|-----------|
| M-2 8:2 FTS    | 14.5 ± 1.3 | 15.7 ± 1.4 | 8.3 ± 0.2 | 19.0 ± 1.6 | 27.2 ± 2.1 | 11.6 ± 0.7 | 3.1 ± 0.5 |

**Table S5.** Instrumental parameters for the analysis of different groups of PFAS.

a) Instrumental parameters of LC-MS/MS for ionic PFAS analysis. Agilent 1290 Infinity II UPLC 6470 QQQ-MS

|                          |                                                                              |  |
|--------------------------|------------------------------------------------------------------------------|--|
| <b>Column</b>            | Acquity BEH C18 1.7 $\mu$ m (2.1 id x 50 mm)                                 |  |
| <b>Column temp</b>       | 40 °C                                                                        |  |
| <b>Mobile phase</b>      | A = 2 mM ammonium acetate in water;<br>B = 2 mM ammonium acetate in methanol |  |
| <b>Flow rate</b>         | 0.4 mL/min                                                                   |  |
| <b>Injection volume</b>  | 5 $\mu$ L                                                                    |  |
| <b>Mode</b>              | Negative ESI using the Agilent jet spray ionization source                   |  |
| <b>Nebulizer</b>         | 25 psi                                                                       |  |
| <b>Gas flow</b>          | 5 L/min                                                                      |  |
| <b>Gas temp</b>          | 300 °C                                                                       |  |
| <b>Capillary voltage</b> | 2800 V                                                                       |  |
| <b>Sheath gas temp</b>   | 330 °C                                                                       |  |
| <b>Sheath gas flow</b>   | 11 L/min                                                                     |  |

  

| <b>Ramp gradient</b> |    |     |
|----------------------|----|-----|
| Time (min)           | %A | %B  |
| 0.0                  | 90 | 10  |
| 0.5                  | 90 | 10  |
| 1.0                  | 60 | 40  |
| 17.5                 | 0  | 100 |
| 18.0                 | 90 | 10  |
| Post-run (3 min)     | 90 | 10  |

b) Instrumental parameters of LC-MS/MS for PAPs analysis. Agilent 1290 Infinity II UPLC 6470 QQQ-MS

|                   |                                                                                                                                  |    |
|-------------------|----------------------------------------------------------------------------------------------------------------------------------|----|
| Column            | Acquity BEH C18 1.7 $\mu$ m (2.1 id x 50 mm)                                                                                     |    |
| Column temp       | 40 °C                                                                                                                            |    |
| Mobile phase      | A = 2 mM ammonium acetate + 5 mM N-Methylpiperidine in water;<br>B = 2 mM ammonium acetate + 5 mM N-Methylpiperidine in methanol |    |
| Flow rate         | 0.4 mL/min                                                                                                                       |    |
| Injection volume  | 5 $\mu$ L                                                                                                                        |    |
| Mode              | Negative ESI using the Agilent jet spray ionization source                                                                       |    |
| Nebulizer         | 25 psi                                                                                                                           |    |
| Gas flow          | 5 L/min                                                                                                                          |    |
| Gas temp          | 300 °C                                                                                                                           |    |
| Capillary voltage | 2800 V                                                                                                                           |    |
| Sheath gas temp   | 330 °C                                                                                                                           |    |
| Sheath gas flow   | 11 L/min                                                                                                                         |    |
| Ramp gradient     |                                                                                                                                  |    |
| Time (min)        | %A                                                                                                                               | %B |
| 0.0               | 90                                                                                                                               | 10 |
| 0.5               | 90                                                                                                                               | 10 |
| 1.0               | 70                                                                                                                               | 30 |

|                  |    |     |
|------------------|----|-----|
| 7.5              | 0  | 100 |
| 8.0              | 90 | 10  |
| Post-run (2 min) | 90 | 10  |

---

c) Instrument parameters of LC-MS/MS for Ultra-short PFAS (TFA, PFPrA, TFMS, and PFEtS) analysis. Agilent 1290 infinity III with 6470 Triple Quad LC/MS

---

|                          |                                                                                                             |
|--------------------------|-------------------------------------------------------------------------------------------------------------|
| <b>Column</b>            | Raptor Polar X, 2.7 $\mu$ m, 50 x 2.1 mm LC Column                                                          |
| <b>Column temp</b>       | 40 °C                                                                                                       |
| <b>Mobile phase</b>      | A = Water, 10 mM ammonium formate, 0.05% formic acid;<br>B = 60:40 Acetonitrile:methanol, 0.05% formic acid |
| <b>Flow rate</b>         | 0.5 mL/min                                                                                                  |
| <b>Injection volume</b>  | 20 $\mu$ L                                                                                                  |
| <b>Mode</b>              | Negative ESI using the Agilent jet spray ionization source                                                  |
| <b>Nebulizer</b>         | 25 psi                                                                                                      |
| <b>Gas flow</b>          | 10 L/min                                                                                                    |
| <b>Gas temp</b>          | 300 °C                                                                                                      |
| <b>Capillary voltage</b> | 2800 V                                                                                                      |
| <b>Sheath gas temp</b>   | 330 °C                                                                                                      |
| <b>Sheath gas flow</b>   | 11 L/min                                                                                                    |

---



---

**Ramp gradient**

|            |    |    |
|------------|----|----|
| Time (min) | %A | %B |
|------------|----|----|

|     |    |    |
|-----|----|----|
| 0.0 | 15 | 85 |
| 8.0 | 15 | 85 |

**Table S6.** Instrumental parameters for GC-MS analysis, Agilent 7890 GC–5977 B PCI-MS

|                                   |                                                    |
|-----------------------------------|----------------------------------------------------|
| <b>Mode</b>                       | Positive chemical ionization                       |
| <b>Inlet temperature</b>          | 200 °C                                             |
| <b>Transfer line temperature</b>  | 200 °C                                             |
| <b>Injection mode</b>             | Pulsed splitless                                   |
| <b>Injection volume</b>           | 2 µL                                               |
| <b>Carrier gas (He) flow rate</b> | 1 mL/min                                           |
| <b>Column</b>                     | CP-Wax 57 CB, 25 m, 0.25 mm, 0.20 µm (Agilent J&W) |
| <b>Reagent Gas</b>                | Methane                                            |
| <b>Source temperature</b>         | 200 °C                                             |
| <b>Quad temperature</b>           | 150 °C                                             |
| <b>Oven program</b>               |                                                    |
| Time (min)                        | Temperature (°C)                                   |
| 0.0                               | 60                                                 |
| 3.0                               | 60                                                 |
| 13.0                              | 85                                                 |
| 20.0                              | 190                                                |
| 28.0                              | 190                                                |

**Table S7.** Ionic PFAS compounds analyzed by LC-MS/MS under ESI (-) mode.

| Abbr.   | Retention time (min) | Mol. Wt. | Precursor ion [M-H/D]- | Fragmentor (volts) | Product ions (m/z) | Collision energy (volts) |
|---------|----------------------|----------|------------------------|--------------------|--------------------|--------------------------|
| TFA     | 1.839                | 113.99   | 113                    | 70                 | 69                 | 16                       |
| PFPrA   | 1.616                | 163.99   | 162.9                  | 64                 | 119                | 5                        |
| PFBA    | 2.243                | 214.04   | 213.0                  | 64                 | 169<br>/           | 5<br>/                   |
| PFPeA   | 3.518                | 264.05   | 263.0                  | 64                 | 218.9<br>140.8     | 5<br>5                   |
| PFHxA   | 5.008                | 314.05   | 313.0                  | 73                 | 268.9<br>119       | 5<br>21                  |
| PFHpA   | 6.646                | 364.06   | 363.0                  | 78                 | 319<br>169         | 5<br>17                  |
| PFOA    | 8.186                | 414.07   | 413.1                  | 83                 | 369<br>169         | 5<br>17                  |
| PFNA    | 9.542                | 464.08   | 463.1                  | 83                 | 419<br>218.9       | 5<br>17                  |
| PFDA    | 10.712               | 514.08   | 513.0                  | 93                 | 468.9<br>269       | 5<br>17                  |
| PFUnDA  | 11.725               | 564.09   | 563.0                  | 102                | 518.9<br>268.9     | 5<br>17                  |
| PFDoDA  | 12.601               | 614.10   | 613.0                  | 102                | 569<br>269         | 9<br>21                  |
| PFTTrDA | 13.347               | 664.11   | 663.1                  | 107                | 619<br>169         | 9<br>29                  |
| PFTeDA  | 13.998               | 714.11   | 713.1                  | 112                | 668.9<br>169       | 13<br>29                 |

| Abbr.   | Retention time (min) | Mol. Wt. | Precursor ion [M-H/D]- | Fragmentor (volts) | Products (m/z) | Collision energy (volts) |
|---------|----------------------|----------|------------------------|--------------------|----------------|--------------------------|
| PFHxDA  | 15.041               | 814.13   | 813.1                  | 121                | 768.9          | 13                       |
|         |                      |          |                        |                    | 168.9          | 37                       |
| TFMS    | 0.859                | 150.08   | 149                    | 140                | 80             | 37                       |
|         |                      |          |                        |                    | 98.9           | 33                       |
| PFETS   | 0.819                | 200.08   | 199                    | 140                | 80             | 37                       |
|         |                      |          |                        |                    | 98.9           | 33                       |
| PFPrS   | 2.748                | 250.09   | 249.1                  | 140                | 80             | 37                       |
|         |                      |          |                        |                    | 98.9           | 33                       |
| PFBS    | 3.876                | 300.10   | 299.0                  | 149                | 80             | 37                       |
|         |                      |          |                        |                    | 98.9           | 37                       |
| PFPeS   | 5.336                | 350.11   | 349.0                  | 175                | 80             | 45                       |
|         |                      |          |                        |                    | 98.9           | 37                       |
| PFHxS   | 6.885                | 400.11   | 399.0                  | 179                | 80             | 45                       |
|         |                      |          |                        |                    | 98.9           | 41                       |
| PFHpS   | 8.357                | 450.12   | 449.0                  | 183                | 80             | 49                       |
|         |                      |          |                        |                    | 98.9           | 45                       |
| PFOS    | 9.647                | 500.13   | 499.0                  | 208                | 80             | 101                      |
|         |                      |          |                        |                    | 98.9           | 49                       |
| PFNS    | 10.776               | 549.93   | 549.0                  | 218                | 80             | 105                      |
|         |                      |          |                        |                    | 98.9           | 49                       |
| PFDS    | 11.764               | 600.14   | 598.9                  | 232                | 80             | 137                      |
|         |                      |          |                        |                    | 98.9           | 53                       |
| PFECHS  | 8.096                | 462.13   | 461.0                  | 150                | 380.9          | 29                       |
|         |                      |          |                        |                    | 98.9           | 29                       |
| Cl-PFOS | 9.897                | 516.58   | 515.0                  | 203                | 80             | 105                      |
|         |                      |          |                        |                    | 98.9           | 49                       |
| FOSA    | 11.159               | 499.14   | 498.0                  | 169                | 78             | 37                       |
|         |                      |          |                        |                    | 48.1           | 150                      |

| Abbr.        | Retention time (min) | Mol. Wt. | Precursor ion [M-H/D]- | Fragmentor (volts) | Products (m/z) | Collision energy (volts) |
|--------------|----------------------|----------|------------------------|--------------------|----------------|--------------------------|
| 6:2 Cl-PFESA | 9.675                | 531.90   | 530.9                  | 161                | 350.9          | 29                       |
|              |                      |          |                        |                    | 83             | 29                       |
| 8:2 Cl-PFESA | 11.078               | 631.90   | 630.9                  | 171                | 450.9          | 33                       |
|              |                      |          |                        |                    | 83             | 33                       |
| 4:2 FTSA     | 4.870                | 328.15   | 327.1                  | 136                | 306.9          | 21                       |
|              |                      |          |                        |                    | 81             | 33                       |
| 6:2 FTSA     | 8.091                | 428.17   | 427.0                  | 164                | 406.9          | 25                       |
|              |                      |          |                        |                    | 81             | 41                       |
| 8:2 FTSA     | 10.676               | 528.18   | 527.0                  | 179                | 506.9          | 29                       |
|              |                      |          |                        |                    | 81             | 41                       |
| 10:2 FTSA    | 10.872               | 628.18   | 627.0                  | 161                | 606.9          | 33                       |
|              |                      |          |                        |                    | 81             | 45                       |
| FPrPA        | 2.673                | 242.1    | 241                    | 94                 | 116.9          | 41                       |
|              |                      |          |                        |                    | 63             | 4                        |
| FPePA        | 6.47                 | 342.1    | 341                    | 108                | 216.9          | 25                       |
|              |                      |          |                        |                    | 237            | 13                       |
| FHpPA        | 8.617                | 442.1    | 441                    | 103                | 317            | 25                       |
|              |                      |          |                        |                    | 337            | 9                        |
| FOPA         | 9.53                 | 492.1    | 491                    | 93                 | 367            | 17                       |
|              |                      |          |                        |                    | 386.9          | 9                        |
| FOSAA        | 9.424                | 557.18   | 556                    | 142                | 497.9          | 29                       |
|              |                      |          |                        |                    | 78             | 49                       |
| N-MeFOSAA    | 9.655                | 571.21   | 570                    | 122                | 218.9          | 25                       |
|              |                      |          |                        |                    | 419            | 17                       |
| N-EtFOSAA    | 10.015               | 585.24   | 584                    | 122                | 218.9          | 25                       |
|              |                      |          |                        |                    | 525.9          | 17                       |
| 6:2 FTUCA    | 6.263                | 358.08   | 357                    | 69                 | 293            | 13                       |

| Abbr.             | Retention time (min) | Mol. Wt. | Precursor ion [M-H/D]- | Fragmentor (volts) | Products (m/z) | Collision energy (volts) |
|-------------------|----------------------|----------|------------------------|--------------------|----------------|--------------------------|
|                   |                      |          |                        |                    | 92.9           | 49                       |
| 8:2 FTUCA         | 8.63                 | 458.1    | 457                    | 83                 | 392.9          | 5                        |
|                   |                      |          |                        |                    | 342.9          | 49                       |
| 10:2 FTUCA        | 10.273               | 558.11   | 557                    | 93                 | 492.9          | 9                        |
|                   |                      |          |                        |                    | 242.9          | 41                       |
| 6:6 PFPiA         | 10.953               | 702.07   | 700.9                  | 205                | 400.9          | 61                       |
|                   |                      |          |                        |                    | 63             | 100                      |
| 6:8 PFPiA         | 11.841               | 802.09   | 800.9                  | 195                | 63             | 100                      |
|                   |                      |          |                        |                    | 100.9          | 97                       |
| 8:8 PFPiA         | 12.524               | 902.1    | 900.9                  | 151                | 500.9          | 69                       |
|                   |                      |          |                        |                    | 63             | 100                      |
| PFHxPA            | 2.773                | 400.03   | 398.9                  | 142                | 79             | 33                       |
| PFOPA             | 6.155                | 500.05   | 498.9                  | 151                | 79             | 41                       |
| PFDPa             | 8.753                | 600.06   | 598.9                  | 166                | 79             | 97                       |
| PFMPA             | 1.9                  | 230.04   | 229                    | 69                 | 84.9           | 9                        |
| PFMBA             | 3.213                | 280.04   | 279                    | 59                 | 85.1           | 5                        |
| NFDHA             | 4.101                | 296.04   | 295                    | 107                | 201            | 5                        |
|                   |                      |          |                        |                    | 85             | 25                       |
| ADONA             | 6.482                | 378.07   | 376.9                  | 79                 | 84.8           | 37                       |
|                   |                      |          |                        |                    | 250.9          | 5                        |
| PFEESA            | 4.15                 | 316.1    | 314.9                  | 161                | 135            | 25                       |
|                   |                      |          |                        |                    | 69             | 61                       |
| HFPO-TA           | 8.696                | 496.07   | 495                    | 171                | 184.9          | 5                        |
|                   |                      |          |                        |                    | 119            | 49                       |
| P3MHpS/<br>P6MHpS | 8.428                | 500.13   | 498.9                  | 171                | 80             | 97                       |
|                   |                      |          |                        |                    | 98.9           | 49                       |
| P7MOS             | 9.293                | 549.93   | 548.9                  | 220                | 80             | 100                      |

| Abbr.                                                        | Retention time (min) | Mol. Wt. | Precursor ion [M-H/D]- | Fragmentor (volts) | Products (m/z) | Collision energy (volts) |
|--------------------------------------------------------------|----------------------|----------|------------------------|--------------------|----------------|--------------------------|
|                                                              |                      |          |                        |                    | 98.9           | 53                       |
| P3MHpA                                                       | 7.596                | 414.07   | 413.0                  | 166                | 368.9          | 5                        |
|                                                              |                      |          |                        |                    | 169            | 17                       |
| P4MOA/<br>P7MOA                                              | 8.328                | 464.08   | 463.0                  | 79                 | 418.9          | 5                        |
|                                                              |                      |          |                        |                    | 168.9          | 17                       |
| P355TMHx<br>A                                                | 8.328                | 464.08   | 463.0                  | 190                | 218.9          | 5                        |
|                                                              |                      |          |                        |                    | 468.9          | 5                        |
| P37DMOA                                                      | 9.485                | 514.08   | 513.0                  | 200                | 69             | 49                       |
|                                                              |                      |          |                        |                    | 442.9          | 17                       |
| 6:2 diPAP                                                    | 6.050                | 789.98   | 789                    | 132                | 97             | 37                       |
|                                                              |                      |          |                        |                    | 443            | 21                       |
| 6:2/8:2<br>diPAP                                             | 6.232                | 889.98   | 889                    | 156                | 96.9           | 33                       |
|                                                              |                      |          |                        |                    |                |                          |
| 8:2 diPAP                                                    | 6.375                | 989.97   | 989                    | 151                | 542.9          | 25                       |
|                                                              |                      |          |                        |                    | 96.8           | 37                       |
| 10:2 diPAP                                                   | 6.608                | 1189.97  | 1188.9                 | 150                | 78.9           | 37                       |
|                                                              |                      |          |                        |                    | 525.9          | 17                       |
| diSAmPAP                                                     | 6.502                | 1204     | 1203                   | 150                | 679.9          | 20                       |
|                                                              |                      |          |                        |                    | 442.9          | 17                       |
| 6:2 triPAP                                                   | 6.758                | 1136.26  | 789                    | 132                | 97             | 37                       |
|                                                              |                      |          |                        |                    |                |                          |
| M4-8:2<br>diPAP<br>(surrogate<br>standard,<br>SS)            | 6.373                | 994      | 993                    | 137                | 97             | 37                       |
|                                                              |                      |          |                        |                    | 79             | 37                       |
| <sup>13</sup> C <sub>2</sub> -TFA<br>(surrogate<br>standard, | 1.838                | 116      | 115                    | 70                 | 70             | 24                       |

| Abbr.                                                        | Retention time (min) | Mol. Wt. | Precursor ion [M-H/D]- | Fragmentor (volts) | Products (m/z) | Collision energy (volts) |
|--------------------------------------------------------------|----------------------|----------|------------------------|--------------------|----------------|--------------------------|
| SS)                                                          |                      |          |                        |                    |                |                          |
| <sup>13</sup> C <sub>3</sub> -PFPrA (surrogate standard, SS) | 1.628                | 167.04   | 166                    | 64                 | 121            | 5                        |
| M3PFBA (surrogate standard, SS)                              | 2.242                | 217.04   | 216                    | 64                 | 172            | 5                        |
| MPFHxA (SS)                                                  | 4.999                | 316.05   | 315.1                  | 78                 | 270            | 5                        |
| MPFOA (SS)                                                   | 8.185                | 418.07   | 417.1                  | 83                 | 372            | 5                        |
| MPFUnDA (SS)                                                 | 11.725               | 566.09   | 565.1                  | 97                 | 520            | 9                        |
| M2PFTeDA (SS)                                                | 13.997               | 716.11   | 715.1                  | 116                | 669.9          | 13                       |
| M3PFBS (SS)                                                  | 3.874                | 303.10   | 302.0                  | 149                | 80             | 45                       |
| MPFHxS (SS)                                                  | 6.882                | 404.11   | 403.0                  | 169                | 84             | 49                       |
| MPFOS (SS)                                                   | 9.646                | 504.13   | 503.0                  | 198                | 80             | 93                       |
| M2-8:2 FTSA (SS)                                             | 10.675               | 530.18   | 529.0                  | 195                | 509            | 33                       |
| MPFBA (internal standard, IS)                                | 2.240                | 218.04   | 217.0                  | 64                 | 172            | 5                        |
| M8PFOA (IS)                                                  | 8.184                | 422.07   | 421.1                  | 83                 | 376            | 5                        |

| <b>Abbr.</b>      | <b>Retention time (min)</b> | <b>Mol. Wt.</b> | <b>Precursor ion [M-H/D]-</b> | <b>Fragmentor (volts)</b> | <b>Products (m/z)</b> | <b>Collision energy (volts)</b> |
|-------------------|-----------------------------|-----------------|-------------------------------|---------------------------|-----------------------|---------------------------------|
| M7PFUnDA (IS)     | 11.724                      | 571.09          | 570.0                         | 97                        | 525                   | 9                               |
| M3PFHxS (IS)      | 6.883                       | 403.11          | 402.0                         | 184                       | 80                    | 45                              |
| M8PFOS (IS)       | 9.637                       | 508.13          | 507.0                         | 203                       | 79.9                  | 97                              |
| M4-6:2 diPAP (IS) | 5.288                       | 794             | 793                           | 137                       | 445                   | 21                              |

**Table S8.** PFAS analyzed by GC-MS under positive chemical ionization (PCI) mode.

| <b>Abbr.</b>           | <b>Mol. Wt.</b> | <b>Retention time (min)</b> | <b>Quantifier</b> | <b>Qualifier</b> |
|------------------------|-----------------|-----------------------------|-------------------|------------------|
| 4:2 FTOH               | 264.09          | 6.430                       | 265               | 227              |
| 6:2 FTOH               | 364.10          | 8.448                       | 365               | 327              |
| 8:2 FTOH               | 464.12          | 10.311                      | 465               | 427              |
| 10:2 FTOH              | 564.13          | 11.464                      | 565               | 527              |
| 6:2 FTAc               | 418.15          | 6.462                       | 419               | 399              |
| 8:2 FTAc               | 518.17          | 9.466                       | 519               | 499              |
| 10:2FTAc               | 618.18          | 11.099                      | 619               | 599              |
| 6:2 FTMAc              | 432.18          | 8.141                       | 433               | 413              |
| 8:2 FTMAc              | 532.19          | 10.388                      | 533               | 513              |
| MeFOSE                 | 557.22          | 15.636                      | 558               | 540              |
| EtFOSE                 | 571.25          | 15.688                      | 572               | 554              |
| MeFBSE                 | 357.21          | 15.636                      | 358               | 340              |
| EtFBSE                 | 371.24          | 15.678                      | 372               | 354              |
| 8:2FTOAc               | 506.16          | 7.277                       | 507               | 535              |
| 10:2FTOAc              | 606.17          | 10.215                      | 607               | 635              |
| PCBTF                  | 180.55          | 5.762                       | 161               | 181              |
| M4-4:2<br>FTOH (SS)    | 268.09          | 6.316                       | 269               | 231              |
| M4-<br>6:2FTOH<br>(SS) | 368.10          | 8.448                       | 369               | 331              |
| M2-8:2<br>FTOH (SS)    | 466.12          | 10.311                      | 467               | 429              |

|                  |        |        |     |     |
|------------------|--------|--------|-----|-----|
| dMeFOSE (SS)     | 564.22 | 15.605 | 565 | 547 |
| D9-EtFOSE (IS)   | 580.25 | 15.636 | 581 | 563 |
| M4-8:2 FTOH (IS) | 468.12 | 10.310 | 469 | 431 |

**Table S9.** Field, and procedural blanks for target analysis and for TOP and hydrolysis assay (ng, average  $\pm$  standard error), matrix spike recoveries (MS%, mean  $\pm$  standard error) and method detection limits (MDLs, after blank correction, ng/g) of individual PFAS analytes from the MS analyses. ORIG, TOP and HYD represent original extraction blank, the TOP assay blank, and hydrolysis blank samples, respectively.

|         | Blanks (ng)     |                   |                | MS recovery (%) |                | MDL (ng/g) |      |     |
|---------|-----------------|-------------------|----------------|-----------------|----------------|------------|------|-----|
|         | ORIG<br>(n = 3) | dTOP<br>(n = 3)   | HYD<br>(n = 4) | ORIG<br>(n=3)   | dTOP<br>(n=2)  | ORIG       | dTOP | HYD |
| TFA     | 0.36 $\pm$ 0.03 | 0.54 $\pm$ 0.02   | NA*            | 78.6 $\pm$ 0.27 | Not test       | 5.06       | 32.2 | NA  |
| PFPrA   | 0.06 $\pm$ 0.01 | 0.31 $\pm$ 0.07   | NA             | 103 $\pm$ 1.56  | 95.7 $\pm$ 4.5 | 0.67       | 34.1 | NA  |
| PFBA    | 0.03 $\pm$ 0.00 | ND                | NA             | 89.7 $\pm$ 1.2  | 133 $\pm$ 3.1  | 0.49       | 3.45 | NA  |
| PFPeA   | ND**            | 0.039 $\pm$ 0.004 | NA             | 111 $\pm$ 4.3   | 156 $\pm$ 1.2  | 0.09       | 4.29 | NA  |
| PFHxA   | ND              | 0.071 $\pm$ 0.013 | NA             | 84.4 $\pm$ 1.5  | 21.5 $\pm$ 1.7 | 0.07       | 6.98 | NA  |
| PFHpA   | ND              | ND                | NA             | 86.4 $\pm$ 0.64 | 77.3 $\pm$ 1.5 | 0.05       | 4.73 | NA  |
| PFOA    | ND              | 0.027 $\pm$ 0.008 | NA             | 89.4 $\pm$ 0.89 | 86.6 $\pm$ 4.1 | 0.04       | 5.20 | NA  |
| PFNA    | ND              | ND                | NA             | 79.1 $\pm$ 3.4  | 83.7 $\pm$ 2.5 | 0.16       | 3.74 | NA  |
| PFDA    | ND              | ND                | NA             | 84.1 $\pm$ 2.7  | 80.0 $\pm$ 4.7 | 0.16       | 6.29 | NA  |
| PFUnDA  | ND              | 0.020 $\pm$ 0.01  | NA             | 91.5 $\pm$ 2.4  | 74.7 $\pm$ 2.4 | 0.10       | 1.80 | NA  |
| PFDoDA  | ND              | ND                | NA             | 87.6 $\pm$ 1.6  | 32.6 $\pm$ 0.6 | 0.10       | 0.45 | NA  |
| PFTTrDA | 0.01 (n=1)      | ND                | NA             | 82.8 $\pm$ 1.0  | 12.7 $\pm$ 2.0 | 0.14       | 0.30 | NA  |
| PFTeDA  | ND              | 0.009 $\pm$ 0.002 | NA             | 84.7 $\pm$ 2.3  | 7.8 $\pm$ 1.6  | 0.08       | 0.97 | NA  |
| PFHxDA  | 0.05 $\pm$ 0.00 | 0.024 $\pm$ 0.001 | NA             | 121 $\pm$ 3.2   | 7.4 $\pm$ 2.1  | 0.65       | 1.55 | NA  |
| TFMS    | 0.01 $\pm$ 0.00 | ND                | NA             | Not test        | Not test       | 0.12       | 2.88 | NA  |
| PFEtS   | ND              | ND                | NA             | Not test        | Not test       | 0.1        | 0.5  | NA  |
| PFPrS   | ND              | ND                | NA             | 82.4 $\pm$ 0.8  | 29.8 $\pm$ 4.9 | 0.08       | 3.18 | NA  |
| PFBS    | ND              | 0.007 (n=1)       | NA             | 92.2 $\pm$ 2.0  | 78.0 $\pm$ 4.2 | 0.01       | 3.58 | NA  |
| PFPeS   | ND              | ND                | NA             | 97.4 $\pm$ 2.4  | 94.4 $\pm$ 3.7 | 0.01       | 5.03 | NA  |
| PFHxS   | ND              | ND                | NA             | 87.9 $\pm$ 0.5  | 89.8 $\pm$ 1.9 | 0.20       | 2.37 | NA  |

|               |             |             |           |           |          |       |      |       |
|---------------|-------------|-------------|-----------|-----------|----------|-------|------|-------|
| PFHpS         | ND          | 0.012±0.001 | NA        | 114±4.3   | 74.0±1.7 | 0.06  | 4.34 | NA    |
| PFOS          | 0.011 (n=1) | 0.011±0.001 | NA        | 106±7.3   | 65.0±3.4 | 0.06  | 6.18 | NA    |
| PFNS          | ND          | ND          | NA        | 103±5.7   | 65.7±0.5 | 0.02  | 4.40 | NA    |
| PFDS          | ND          | ND          | NA        | 116±1.3   | 57.9±3.7 | 0.09  | 7.63 | NA    |
| PFECHS        | ND          | NA          | NA        | 108±5.3   | NA       | 0.03  | 7.58 | NA    |
| Cl-PFOS       | ND          | NA          | NA        | 124±3.4   | NA       | 0.05  | NA   | NA    |
| 4:2 FTSA      | ND          | NA          | NA        | 89.7±3.5  | NA       | 0.03  | 11.3 | NA    |
| 6:2 FTSA      | ND          | NA          | NA        | 108±5.7   | NA       | 0.05  | 13.6 | NA    |
| 8:2 FTSA      | 0.01 (n=1)  | NA          | NA        | 113±3.2   | NA       | 0.03  | 19.3 | NA    |
| 10:2 FTSA     | ND          | NA          | NA        | 126±7.8   | NA       | 0.013 | 31.5 | NA    |
| FBSA          | ND          | NA          | NA        | 85.5±1.1  | NA       | 0.30  | 4.31 | NA    |
| FHxSA         | ND          | NA          | NA        | 111±2.6   | NA       | 0.28  | 3.90 | NA    |
| FOSA          | ND          | NA          | NA        | 109±3.2   | NA       | 0.02  | 4.31 | NA    |
| MeFOSA        | ND          | NA          | NA        | 111±4.7   | NA       | 0.01  | 10.1 | NA    |
| EtFOSA        | ND          | NA          | NA        | 105±3.1   | NA       | 0.01  | 8.05 | NA    |
| 4:2 FTOH      | ND          | NA          | ND        | 67.2±0.7  | NA       | 5.4   | NA   | 27.0  |
| 6:2 FTOH      | ND          | NA          | ND        | 87.4±10.8 | NA       | 2.7   | NA   | 14.6  |
| 8:2 FTOH      | 0.14±0.05   | NA          | 0.12±0.21 | 89.3±0.7  | NA       | 16.3  | NA   | 22.1  |
| 10:2 FTOH     | ND          | NA          | ND        | 103±2.6   | NA       | 8.7   | NA   | 42.3  |
| MeFOSE        | 0.85±0.02   | NA          | 0.65±0.02 | 91.5±0.3  | NA       | 9.5   | NA   | 134.9 |
| EtFOSE        | ND          | NA          | ND        | 91.5±0.3  | NA       | 5.4   | NA   | 29.2  |
| MeFBSE        | ND          | NA          | 0.85±0.13 | 92.8±1.8  | NA       | 2.6   | NA   | 42.7  |
| EtFBSE        | ND          | NA          | ND        | 93.2±2.7  | NA       | 2.6   | NA   | 14.1  |
| 8:2FTOAc      | ND          | NA          | ND        | 87.2±1.8  | NA       | 2.6   | NA   | 14.1  |
| 10:2FTOAc     | ND          | NA          | ND        | 89.1±3.1  | NA       | 2.6   | NA   | 14.1  |
| 6:2 FTAc      | ND          | NA          | ND        | 79.3±1.2  | NA       | 2.6   | NA   | 14.0  |
| 8:2 FTAc      | ND          | NA          | ND        | 90.0±1.3  | NA       | 3.3   | NA   | 17.8  |
| 10:2 FTAc     | ND          | NA          | ND        | 92.2±5.9  | NA       | 12.9  | NA   | 69.6  |
| 6:2 FTMAc     | ND          | NA          | ND        | 82.3±0.23 | NA       | 2.9   | NA   | 15.7  |
| 8:2 FTMAc     | ND          | NA          | ND        | 82.1±2.3  | NA       | 5.5   | NA   | 29.7  |
| PCBTF         | ND          | NA          | ND        |           | NA       | 2.6   | NA   | 13.1  |
| 10:2 diPAP    | ND          | NA          | NA        | 67.5±1.1  | NA       | 0.09  | NA   | NA    |
| diSAmPAP      | ND          | NA          | NA        | 70.2±1.9  | NA       | 0.06  | NA   | NA    |
| 6:2 diPAP     | 0.003±0.00  | NA          | NA        | 89.6±0.35 | NA       | 0.07  | NA   | NA    |
| 6:2/8:2 diPAP | ND          | NA          | NA        | 90.6±1.3  | NA       | 0.01  | NA   | NA    |

|            |    |    |    |          |    |      |    |    |
|------------|----|----|----|----------|----|------|----|----|
| 8:2 diPAP  | ND | NA | NA | 79.7±1.1 | NA | 0.10 | NA | NA |
| 6:2 triPAP | ND | NA | NA | NA       | NA | 0.06 | NA | NA |

\*NA: Not Applicable.

\*\*ND: Not Detected.

**Table S10.** Surrogate recoveries (% , average ± standard error) for original extraction and dTOP assay process.

|                         | <b>ORIGINAL</b> | <b>dTOP</b> |
|-------------------------|-----------------|-------------|
| 13C <sub>2</sub> -TFA   | 89.4 ± 3.8      | NA*         |
| 13C <sub>3</sub> -PFPrA | 114 ± 3.2       | NA          |
| M3PFBA                  | 102 ± 0.8       | 118 ± 1.4   |
| M3PFBS                  | 80.9 ± 0.9      | NA          |
| MPFHxA                  | 70.5± 1.4       | 75.3 ± 2.2  |
| MPFHxS                  | 90.5 ± 1.5      | NA          |
| MPFOA                   | 88.6 ± 1.1      | 111 ± 1.6   |
| MPFOS                   | 83.8 ± 1.5      | NA          |
| MPFUdA                  | 83.6 ± 0.9      | NA          |
| M2PFTeDA                | 84.8 ± 1.9      | NA          |
| M2-8:2 FTSA             | 113 ± 7.4       | NA          |
| dMeFOSA                 | 88.8 ± 4.5      | NA          |
| M4-4:2 FTOH             | 69.5 ± 0.7      | NA          |
| M4-6:2 FTOH             | 78.2 ± 0.9      | NA          |
| M2-8:2 FTOH             | 89.1 ± 1.1      | NA          |

|              |            |    |
|--------------|------------|----|
| dMeFOSE      | 94.7 ±0.6  | NA |
| M4-8-2 diPAP | 94.6 ± 3.2 | NA |

\*NA: Not Applicable.

**Table S11.** Recoveries of analytes in the filter test.

| <b>PFCAs</b> | Recoveries<br>±SE/% | PFDS         | 105.6±4.2           | <b>FOSAAs</b>     | Recoveries<br>±SE/% |
|--------------|---------------------|--------------|---------------------|-------------------|---------------------|
| TFA          | 96.0±8.6            | 8Cl-PFOS     | 109.6±12.9          | FOSAA             | 90.6±3.1            |
| PFPrA        | 98.0±2.4            | PFECHS       | 109.6±3.7           | N-EtFOSAA         | 82.3±1.0            |
| PFBA         | 102.5±3.7           |              |                     | N-MeFOSAA         | 86.2±12.2           |
| PFPeA        | 89.2±1.9            | <b>FTSs</b>  | Recoveries<br>±SE/% | <b>Ethers</b>     | Recoveries<br>±SE/% |
| PFHxA        | 96.6±3.8            | 4:2 FTS      | 101.2±1.1           | 6-2 Cl PFESA      | 108.6±4.9           |
| PFHpA        | 102.3±4.3           | 6:2 FTS      | 98.2±1.9            | 8-2 Cl PFESA      | 105.9±3.6           |
| PFOA         | 98.3±4.7            | 8:2 FTS      | 112.7±9.9           | PFEESA            | 119.4±5.1           |
| PFNA         | 99.7±8.2            | 10:2 FTS     | 103.8±2.4           | <b>PFPIs</b>      | Recoveries<br>±SE/% |
| PFDA         | 89.6±0.4            | <b>FTUAs</b> | Recoveries<br>±SE/% | 6:6PFPIA          | 85.1±1.4            |
| PFUdA        | 103.2±1.4           | FHUEA        | 72.1±3.4            | 6:8PFPIA          | 85.4±2.9            |
| PFDoA        | 87.3±1.5            | FOUEA        | 87.0±3.4            | 8:8PFPIA          | 87.3±1.4            |
| PFTTrDA      | 87.0±2.1            | FDUEA        | 72.9±3.1            | <b>SURROGATES</b> | Recoveries<br>±SE/% |
| PFTeDA       | 91.9±1.6            | <b>FTAs</b>  | Recoveries<br>±SE/% | dMeFOSA           | 107.0±2.3           |
| PFHxDA       | 86.4±0.8            | FPrPA        | 111.5±9.4           | M2-8:2 FTS        | 90.8±15.4           |
| <b>PFSAs</b> |                     | FPePA        | 112.6±6.9           | MPFOS             | 99.2±0.9            |
| PFPrS        | 95.6±2.7            | FHpPA        | 112.5±5.1           | MPFUdA            | 91.7±4.2            |
| PFBS         | 100.2±3.5           | <b>FASAs</b> |                     | M2PFTeDA          | 83.5±0.2            |
| PFPeS        | 108.4±1.3           | FBSA         | 97.4±2.9            | M3PFBA            | 92.4±3.0            |
| PFHxS        | 98.1±3.6            | FHxSA        | 113.8±4.1           | M3PFBS            | 87.4±2.7            |
| PFHpS        | 116.6±3.2           | FOSA         | 126.6±1.7           | MPFHxA            | 86.7±4.9            |

|      |           |        |           |        |          |
|------|-----------|--------|-----------|--------|----------|
| PFOS | 117.0±4.2 | MeFOSA | 110.6±8.8 | MPFHxS | 89.4±2.4 |
| PFNS | 105.2±7.0 | EtFOSA | 109.5±8.2 | MPFOA  | 92.2±3.7 |

**Table S12.** Parameters assigned to individual PFASs (detection frequencies  $\geq 50\%$  in the dust) for estimation of daily PFAA intake by dismantle worker via dust ingestion. The 5<sup>th</sup> percentile, median, and 95<sup>th</sup> percentile dust concentrations ( $C_{\text{dust}}$ ) were applied for low (L)-, intermediate (M)-, and high (H)-exposure scenarios, respectively. Quantity of ingested dust ( $q_{\text{dust}}$ ), fraction of time work ( $f_{\text{time\_work}}$ ), and body weight ( $m_{\text{bw}}$ ) of worker were based on USEPA<sup>13</sup> and Winkens, et al.<sup>14</sup>. The gastrointestinal uptake factor ( $F_{\text{uptake}}$ ) and the biotransformation ( $F_{\text{biotransf.}}$ , applicable to precursor compounds only) of individual PFAS compounds were summarized by Gebbink, Berger and Cousins<sup>10</sup> and some values were from Wu, et al.<sup>3</sup> We assumed that workers were exposed 8h/day for 5 days in the facility, so  $f_{\text{time\_work}} = (5*8)/(7*24) = 0.238$ .

|                 | $C_{\text{dust}}$ (ng/g) |       |       | $q_{\text{dust}}$ (mg/day, worker) |    |    | $f_{\text{time\_work}}$ | $m_{\text{bw}}$ (kg) | $F_{\text{uptake}}$ |     |      | $F_{\text{biotransf.}}$ |   |   |
|-----------------|--------------------------|-------|-------|------------------------------------|----|----|-------------------------|----------------------|---------------------|-----|------|-------------------------|---|---|
|                 | L                        | M     | H     | L                                  | M  | H  |                         |                      | L                   | M   | H    | L                       | M | H |
| TFA             | 39.9                     | 107.4 | 181.3 | 20                                 | 40 | 60 | 0.238                   | 70                   | 0.66                | 0.8 | 0.91 |                         |   |   |
| PFPrA           | 2.5                      | 8.1   | 22.0  | 20                                 | 40 | 60 | 0.238                   | 70                   | 0.66                | 0.8 | 0.91 |                         |   |   |
| PFBA            | 1.2                      | 4.4   | 11.3  | 20                                 | 40 | 60 | 0.238                   | 70                   | 0.66                | 0.8 | 0.91 |                         |   |   |
| PFPeA           | 0.9                      | 2.9   | 10.8  | 20                                 | 40 | 60 | 0.238                   | 70                   | 0.66                | 0.8 | 0.91 |                         |   |   |
| PFHxA           | 2.0                      | 5.4   | 16.2  | 20                                 | 40 | 60 | 0.238                   | 70                   | 0.66                | 0.8 | 0.91 |                         |   |   |
| PFHpA           | 1.9                      | 4.5   | 12.4  | 20                                 | 40 | 60 | 0.238                   | 70                   | 0.66                | 0.8 | 0.91 |                         |   |   |
| PFOA            | 12.1                     | 33.6  | 81.1  | 20                                 | 40 | 60 | 0.238                   | 70                   | 0.66                | 0.8 | 0.91 |                         |   |   |
| PFNA            | 1.2                      | 5.2   | 18.1  | 20                                 | 40 | 60 | 0.238                   | 70                   | 0.66                | 0.8 | 0.91 |                         |   |   |
| PFDA            | 1.4                      | 3.8   | 9.2   | 20                                 | 40 | 60 | 0.238                   | 70                   | 0.66                | 0.8 | 0.91 |                         |   |   |
| PFUnDA          | 0.8                      | 4.7   | 21.0  | 20                                 | 40 | 60 | 0.238                   | 70                   | 0.66                | 0.8 | 0.91 |                         |   |   |
| PFDoDA          | 1.0                      | 2.8   | 6.1   | 20                                 | 40 | 60 | 0.238                   | 70                   | 0.66                | 0.8 | 0.91 |                         |   |   |
| PFTTrDA         | 0.3                      | 1.2   | 7.7   | 20                                 | 40 | 60 | 0.238                   | 70                   | 0.66                | 0.8 | 0.91 |                         |   |   |
| PFTeDA          | 1.2                      | 3.8   | 8.7   | 20                                 | 40 | 60 | 0.238                   | 70                   | 0.66                | 0.8 | 0.91 |                         |   |   |
| P4MOA<br>&P7MOA | 0.5                      | 1.3   | 1.5   | 20                                 | 40 | 60 | 0.238                   | 70                   | 0.66                | 0.8 | 0.91 |                         |   |   |
| TFMS            | 2.0                      | 32.8  | 162.6 | 20                                 | 40 | 60 | 0.238                   | 70                   | 0.66                | 0.8 | 0.91 |                         |   |   |
| PFPrS           | 0.2                      | 1.1   | 3.2   | 20                                 | 40 | 60 | 0.238                   | 70                   | 0.66                | 0.8 | 0.91 |                         |   |   |
| PFBS            | 8.3                      | 62.0  | 586.0 | 20                                 | 40 | 60 | 0.238                   | 70                   | 0.66                | 0.8 | 0.91 |                         |   |   |
| PFHxS           | 1.3                      | 5.4   | 10.8  | 20                                 | 40 | 60 | 0.238                   | 70                   | 0.66                | 0.8 | 0.91 |                         |   |   |
| PFOS            | 4.1                      | 20.1  | 63.3  | 20                                 | 40 | 60 | 0.238                   | 70                   | 0.66                | 0.8 | 0.91 |                         |   |   |
| PFDS            | 2.0                      | 6.9   | 27.4  | 20                                 | 40 | 60 | 0.238                   | 70                   | 0.66                | 0.8 | 0.91 |                         |   |   |

|               |      |       |        |    |    |    |       |    |      |      |      |        |       |       |
|---------------|------|-------|--------|----|----|----|-------|----|------|------|------|--------|-------|-------|
| 6:2 FTSA      | 10.1 | 21.5  | 132.2  | 20 | 40 | 60 | 0.238 | 70 | 0.66 | 0.8  | 0.91 | 0.0002 | 0.005 | 0.017 |
| 8:2 FTSA      | 1.8  | 7.9   | 42.3   | 20 | 40 | 60 | 0.238 | 70 | 0.66 | 0.8  | 0.91 | 0.0002 | 0.005 | 0.017 |
| 10:2 FTSA     | 4.9  | 11.0  | 71.4   | 20 | 40 | 60 | 0.238 | 70 | 0.66 | 0.8  | 0.91 | 0.0002 | 0.005 | 0.017 |
| 6:2 diPAP     | 37.4 | 160.3 | 2980.3 | 20 | 40 | 60 | 0.238 | 70 | 0.66 | 0.8  | 0.91 | 0.0012 | 0.006 | 0.02  |
| 6:2-8:2 diPAP | 32.1 | 71.9  | 365.0  | 20 | 40 | 60 | 0.238 | 70 | 0.66 | 0.8  | 0.91 | 0.0012 | 0.006 | 0.02  |
| 8:2 diPAP     | 12.3 | 30.5  | 130.7  | 20 | 40 | 60 | 0.238 | 70 | 0.66 | 0.8  | 0.91 | 0.0012 | 0.006 | 0.02  |
| 10:2 diPAP    | 8.2  | 20.4  | 83.0   | 20 | 40 | 60 | 0.238 | 70 | 0.66 | 0.8  | 0.91 | 0.0012 | 0.006 | 0.02  |
| diSAmPAP      | 1.3  | 3.9   | 10.7   | 20 | 40 | 60 | 0.238 | 70 | 0.66 | 0.8  | 0.91 | 0.0012 | 0.006 | 0.02  |
| 6:2 triPAP    | 1.7  | 6.2   | 34.3   | 20 | 40 | 60 | 0.238 | 70 | 0.66 | 0.8  | 0.91 | 0.0018 | 0.009 | 0.03  |
| 6:6 PFPiA     | 0.2  | 0.4   | 0.8    | 20 | 40 | 60 | 0.238 | 70 | 0.66 | 0.8  | 0.91 | 0.0012 | 0.006 | 0.02  |
| 8:8 PFPiA     | 0.1  | 0.1   | 0.3    | 20 | 40 | 60 | 0.238 | 70 | 0.66 | 0.8  | 0.91 | 0.0012 | 0.006 | 0.02  |
| FOSA          | 0.2  | 0.9   | 5.9    | 20 | 40 | 60 | 0.238 | 70 | 0.66 | 0.8  | 0.91 | 0.095  | 0.2   | 0.32  |
| N-MeFOSAA     | 4.6  | 30.8  | 331.0  | 20 | 40 | 60 | 0.238 | 70 | 0.66 | 0.8  | 0.91 | 0.095  | 0.2   | 0.32  |
| 6:2 FTOH      | 23.9 | 49.3  | 119.7  | 20 | 40 | 60 | 0.238 | 70 | 0.27 | 0.38 | 0.56 | 0.006  | 0.003 | 0.01  |
| 8:2 FTOH      | 11.4 | 22.4  | 159.4  | 20 | 40 | 60 | 0.238 | 70 | 0.27 | 0.38 | 0.56 | 0.006  | 0.003 | 0.01  |
| 10:2 FTOH     | 15.2 | 60.3  | 213.7  | 20 | 40 | 60 | 0.238 | 70 | 0.27 | 0.38 | 0.56 | 0.006  | 0.003 | 0.01  |
| 8:2 FTMAcr    | 25.9 | 51.6  | 1316.4 | 20 | 40 | 60 | 0.238 | 70 | 0.66 | 0.8  | 0.91 | 0.006  | 0.003 | 0.01  |
| MeFOSE        | 4.7  | 8.6   | 17.8   | 20 | 40 | 60 | 0.238 | 70 | 0.66 | 0.8  | 0.91 | 0.095  | 0.2   | 0.32  |
| EtFOSE        | 14.6 | 36.3  | 137.5  | 20 | 40 | 60 | 0.238 | 70 | 0.66 | 0.8  | 0.91 | 0.095  | 0.2   | 0.32  |

**Table S13-S15 included as separate excel spreadsheets.**

## References

- (1) Stubbings, W. A.; Nguyen, L. V.; Romanak, K.; Jantunen, L.; Melymuk, L.; Arrandale, V.; Diamond, M. L.; Venier, M. Flame retardants and plasticizers in a Canadian waste electrical and electronic equipment (WEEE) dismantling facility. *Sci. Total Environ.* **2019**, *675*, 594-603.
- (2) Ubukata, M.; Jobst, K. J.; Reiner, E. J.; Reichenbach, S. E.; Tao, Q.; Hang, J.; Wu, Z.; Dane, A. J.; Cody, R. B. Non-targeted analysis of electronics waste by comprehensive two-dimensional gas chromatography combined with high-resolution mass spectrometry: Using accurate mass information and mass defect analysis to explore the data. *J Chromatogr A* **2015**, *1395*, 152-9.
- (3) Wu, Y.; Romanak, K.; Bruton, T.; Blum, A.; Venier, M. Per- and polyfluoroalkyl substances in paired dust and carpets from childcare centers. *Chemosphere* **2020**, *251*, 126771.
- (4) Zheng, G.; Boor, B. E.; Schreder, E.; Salamova, A. Indoor exposure to per- and polyfluoroalkyl substances (PFAS) in the childcare environment. *Environ. Pollut.* **2020**, *258*, 113714.
- (5) Capozzi, S. L.; Xia, C.; Shuwal, M.; Zaharias Miller, G.; Gearhart, J.; Bloom, E.; Gehrenkemper, L.; Venier, M. From watersheds to dinner plates: Evaluating PFAS exposure through fish consumption in Southeast Michigan. *Chemosphere* **2023**, *345*, 140454.
- (6) Gockener, B.; Fliedner, A.; Rudel, H.; Fettig, I.; Koschorreck, J. Exploring unknown per- and polyfluoroalkyl substances in the German environment - The total oxidizable precursor assay as helpful tool in research and regulation. *Sci. Total Environ.* **2021**, *782*, 146825.
- (7) Wu, Y.; Miller, G. Z.; Gearhart, J.; Peaslee, G.; Venier, M. Side-chain fluorotelomer-based polymers in children car seats. *Environ. Pollut.* **2021**, *268*, (Pt B), 115477.
- (8) Xia, C.; Diamond, M. L.; Peaslee, G. F.; Peng, H.; Blum, A.; Wang, Z.; Shalin, A.; Whitehead, H. D.; Green, M.; Schwartz-Narbonne, H.; Yang, D.; Venier, M. Per- and Polyfluoroalkyl Substances in North American School Uniforms. *Environ Sci Technol* **2022**, *56*, (19), 13845-13857.
- (9) Schwartz-Narbonne, H.; Xia, C.; Shalin, A.; Whitehead, H. D.; Yang, D.; Peaslee, G. F.; Wang, Z.; Wu, Y.; Peng, H.; Blum, A.; Venier, M.; Diamond, M. L. Per- and Polyfluoroalkyl Substances in Canadian Fast Food Packaging. *Environ. Sci. Technol. Lett.* **2023**, 10.1021/acs.estlett.2c00926.
- (10) Gebbink, W. A.; Berger, U.; Cousins, I. T. Estimating human exposure to PFOS isomers and PFCA homologues: the relative importance of direct and indirect (precursor) exposure. *Environ Int* **2015**, *74*, 160-9.
- (11) USEPA. *Exposure Factors Handbook Chapter 5 (update 2017)*; 2017, (accessed).
- (12) Vestergren, R.; Cousins, I. T.; Trudel, D.; Wormuth, M.; Scheringer, M. Estimating the contribution of precursor compounds in consumer exposure to PFOS and PFOA. *Chemosphere* **2008**, *73*, (10), 1617-24.
- (13) USEPA. Child-specific exposure factors handbook [http://ofmpub.epa.gov/eims/eimscomm.getfile?p\\_download\\_id=484738](http://ofmpub.epa.gov/eims/eimscomm.getfile?p_download_id=484738) (accessed July 27).
- (14) Winkens, K.; Giovanoulis, G.; Koponen, J.; Vestergren, R.; Berger, U.; Karvonen, A. M.; Pekkanen, J.; Kiviranta, H.; Cousins, I. T. Perfluoroalkyl acids and their precursors in floor dust of children's bedrooms - Implications for indoor exposure. *Environ. Int.* **2018**, *119*, 493-502.
