# Supplementary material
Source: Royal Society of Chemistry journal article supplement (doi:10.1039/d5em01075f)
Supplement: d5em01075f2.xlsx [file d5em01075f2.xlsx]

## Sheet: orig, extraction-Table S13
dTOP, ng/g	Bin-1	Bench-1	Bin-2	Floor-1	Floor-2	Bench-2	Floor-3	Bench-3	Floor-4	Floor-5	Floor-6	Floor-7	Bin-3	Bin-4	Bin-5	Bench-4	Floor-8	Floor-9	Composite
Sample Type	Bin	Bench	Bin	Floor	Floor	Bench	Floor	Bench	Floor	Floor	Floor	Floor	Bin	Bin	Bin	Bench	Floor	Floor	Composite
PFCAs
TFA	38.9389	43.0867	50.9034	107.38	59.4033	130.463	85.3783	121.808	176.591	126.613	43.5793	70.0871	71.8393	166.066	109.46	39.9691	140.485	156.88	223.209
PFPrA	1.31389	5.44667	12.4541	7.54325	8.0823	7.96151	16.545	13.9876	14.2774	9.20537	6.7239	15.3238	6.39763	21.8524	10.7439	4.65774	2.57994	3.30128	23.6505
PFBA	0.772222		7.30918	4.12039	3.09465	10.7993	6.49735	4.72637	6.7699	1.31912	2.14257	8.22993	4.74281	9.66833	2.78386	3.35751	2.01489	2.76632	14.1332
PFPeA				2.91833		4.086	1.59921	2.97761	2.90299				1.63959	5.60697		1.18415		0.673077	15.1228
PFHxA	4.5125	9	14.5507	5.60436	4.01728	9.07371	6.44444	5.17164	7.29104	4.17062	2.43675	7.87347	5.35025	10.8308	1.58737	4.31473	2.07184	2.68007	30.7221
PFHpA	4.54583	4	8.46377	5.18693	2.47901	8.93612	5.09524	3.81343	5.22388	3.39336	2.0512	6.56735	3.1269	10.7363	1.00211	5.80469	2.29029	2.76748	27.701
PFOA	45.5	24.08	65.5797	37.441	14.6272	55.2187	33.5873	20.3657	35.8134	16.6161	13.0482	41.3878	19.8426	41.8756	3.51789	48.3962	16.5136	19.9615	220.991
PFNA		19.48	5.63768	3.82759	5.15309	5.12285	6.67063	5.29851	9.8097	4.6019	14.6386	17.8122	2.91371	10.9652	1.08421	1.8058	1.17573	1.66608	6.63027
P4MOA+ P7MOA				7.11978										17.5622					1.49132
P355TMHxA
PFDA	0.5375	3.66		3.49002	1.63704	4.47174	3.84524	5.85075	4.38806	2.36493	2.77711	5.46939	4.41624	5.15423		2.71987	1.74951	7.71853	15.3747
P37DMOA
PFUdA	1.07917	8.94	7.42029	2.64973	2.53333	5.4398	4.31349	5.87313	6.48507	4.93839	60.9518	16.5184	1.95939	9.99005	0.810526	0.738839	1.23204	1.6451	4.67742
PFDoA		3.7	4.53623	2.70599	1.61975	5.79607	3.24206	1.56716	5.99627	1.54028	2.79819	5.33878	1.41624	6.90547	0.566316	1.53795	1.02718	1.12063	5.567
PFTrDA		1.62	1.37681	1.11978	1.02469	2.48894	0.996032	0.91791	2.62687	2.57346	8.97892	7.44082	0.614213	4.28358	0.0442105	0.402902	0.571845	0.629371	1.23325
PFTeDA	3.32917	12.1	8.31884	2.64791	2.91605	5.38329	3.84127	4.76119	5.46269	4.35545	2.93675	4.82857	3.08122	6.52736	1.48211	1.21875	0.982524	1.81294	3.99504
PFHxDA				0.384755		1.33661		1.50746	1.0597			0.934694		1.42289					1.3139
PFSAs
TFMS	1.03889	23.2867	103.802	11.2674	33.6626	19.9124	12.0688	42.4428	14.0609	32.7978	22.5522	17.7524	32.8088	33.4992	247.236	2.08631	47.5731	77.046	153.205
PFEtS
PFPrS					0.293827	3.25799		2.14925	2.25746	1.21801			0.42132	3.18905	0.24	0.992187	0.194175	0.72028	1.59057
PFBS	3.69583	1075.76	110.159	92.9056	39.4321	461.658	126.425	62	249.265	52.5782	42.8554	102.49	28.5584	531.557	8.79158	16.2109	21.5087	29.2308	175.923
PFPeS					0.632099	0.464373	0.357143
PFHxS	0.691667	2	5.21739	5.01452	6.9679	6.64865	6.05159	7.38806	7.0709	5.39336	4.17771	9.1551	10.2183	16.1542	1.41895	1.57254	3.57961	4.4021	5.55087
PFHpS					0.333333	0.63145	0.543651	0.597015		0.255924	0.162651						0.199029	0.293706	0.616625
PFOS	3.82083	15.62	30.8986	14.1289	20.116	37.2408	25.1349	62.2612	23.7052	28.5735	14.0151	25.7469	17.7766	72.6567	5.60421	4.12165	12.4748	15.2622	53.0658
P3MHpS+P6MHpS
PFNS
P7MOS
PFDS	2.09167	10.12	5.08696	6.73866	3.60247	22.7371	17.1111	7.08955	18.9142	3.66351	6.34639	54.1388	12.934	14.1493	1.79579		6.47767	5.57517	10.3598
8Cl-PFOS						1.13268			0.798507
FTSs																	0	0	0
4:2 FTS
6:2 FTS	3.5875	19.6		36.8221	20.2494	42.2826	22.2738	20.7239	77.9515	20.6825	16.6205	37.3388	47.2792	69.0647	11.2989	46.4498	19.2427	11.8759	439.746
8:2 FTS	0.708333	4.68	2.66667	19.2541	7.4	34.2654	12.8294	13.4104	39.0149	6.23697	7.93072	18.6735	9.53807	38.9453	2.61684	1.92188	6.55243	4.71503	71.8685
10:2 FTS	5.95	6.24	6.13043	23.3358	8.65679	68.4791	23.9881	14.3134	51.8657	11.9194	10.0572	29.5265	8.53807	54.1244		3.40848	9.21068	5.18706	87.7531
FTUAs
FHUEA																			0.986352
FOUEA												0.657143					0.0883495		3.69975
FDUEA				0.154265								0.171429							0.359801
FTAs
FPrPA
FPePA
FHpPA
FOPA
FDEA
FHEA
FOEA
FASAs
FBSA																			0.511166
FHxSA
FOSA		0.86	0.434783	1.88022	0.728395	1.33415	4.00397	1.0597	1.95149	0.810427	0.298193	0.930612	0.563452	0.721393	0.181053	0.0479911	1.24175	1.2465	16.3375
MeFOSA
EtFOSA																			0.722084
FOSAAs
FOSAA
N-EtFOSAA	3.4125	18.3	467.928	37.9002	18.442	81.4103	26.7143	26.0597	36.4552	31.5782	9.86145	30.7918	34.6447	315.751	4.68421	14.404	86.9864	23.2185	176.962
N-MeFOSAA						3.27764			3.79104							1.79799	1.40583		4.99628
Ether
6-2_Cl_PFESA							1.55556
8-2_Cl_PFESA							0.321429
PFECHS			0.507246		0.101235	0.407862							2.36041				0.240777	0.0856643
PFEESA																			26.4739
ADONA
GenX
HFPO-TA
NFDHA
PFMPA			1.13043	0.272232			0.269841							0.457711	0.162105	0.464286			0.228288
PFMBA																	0.0572816		0.150124
PFPis
6:6PFPiA				0.259528	0.414815	0.810811	0.484127	0.701493	0.91791	0.274882	0.14759	0.612245	0.446701	0.432836	0.2	0.204241	0.151456	0.234266	0.372208
6:8PFPiA						1.17199			0.735075				1.06091			0.370536		0.374126	0.44665
8:8PFPiA			0.289855	0.0834846		0.334152			0.25			0.106122	0.187817	0.104478	0.0652632	0.112723	0.0466019	0.0786713	0.315136
PFAPA
PFHxPA						5.57084										4.46243			12.7982
PFOPA																			4.13027
PFDPA
PAPs
6-2_PAP
8-2_PAP
6-2_diPAP	35.4181	2926.43	303.802	308.208	136.588	365.723	353.688	220.891	3465.53	160.314	117.92	205.969	62.1844	761.808	68.4807	60.2827	37.579	49.2121	80.4955
6-2-8-2_diPAP	25.9917	340.8	304.13	162.485	62.4938	268.666	125.698	71.9403	363.291	49.2275	36.5904	85.1551	47.6447	379.94	51.68	55.952	32.8184	39.8339	98.9839
8-2_diPAP	9.53611	93.5933	105.952	61.0012	23.6979	129.358	50.8479	30.5423	110.917	19.4771	13.255	30.5823	23.2623	143.232	15.3909	24.9851	12.5812	15.1235	57.2812
10-2_diPAP	5.6875	56.74	81.2319	39.3339	15.4691	66.172	28.0556	20.4552	76.6493	12.3839	8.52711	20.4163	9.84772	99.2836	8.8	17.6071	9.96505	11.799	48.3238
SAmPAP
diSAmPAP	0.429167		8.15942	3.82033	3.93333	7.13022	3.71032	4.69403	6.73134	3.4455	4.97892	5.83265	3.08629	13.9851	1.44	3.00446	1.71845	2.12587	10.1787
6-2_triPAP	2.91667	35.66	17.6812	6.15789	3.43951	15.6069	8.00794	11.8433	34.194	7.42654	3.83434	11.5143	4.62437	13.2886	1.87789	5.80357	1.59417	1.82692	1.75062
Neutral PFAS
4:2 FTOH
6:2 FTOH	39.5542	158.78	115.319	26.3285	27.2444	66.2703	60.6429	71.4179	56.5075	49.3175	32.741	53.4408	41.7868	75.4129	40.7284	20.4353	24.3058	39.0437	49.6849
8:2 FTOH	16.9917			20.0762	11.4123	39.1155	50.119		29.4776	16.7962	11.3855	19.1306		39.8458	22.3537	15.7254	25.1417	30.1871	414.455
10:2 FTOH	59.1792	268.86	203.928	33.637	39.1926	49.543	69.6032	104.291	61.3507	67.8531	45.0873	64.4245	68.9746	81.4776		12.7054	15.5825	21.1591	56.5136
6:2 FTAcr										19.5498					26.3221
8:2 FTAcr				23.4537		25.3194	40.7619		39.7948		30.5301					20.1194			23.5844
10:2 FTAcr
6:2 FTMAcr																			20.897
8:2 FTMAcr				24.8748	31.5309	26.6093	49.7897	75.6269		52.6682	45.3584	47.9102	52.8985	53.6866			51.599	70.028	3177.66
MeFOSE	5.3375			4.93648	4.19259	8.4398	4.98016	12.3358	4.92537	8.80095	15.8133	16.7673		7.36318			10.3524	9.72552	19.84
EtFOSE	37.2167	164.22	128.551	17.4065	22.1432	27.2801	35.4802	65.0299	35.194	41.2796	27.1657	46.7184	43.533	47.4279			6.37961		19.5893
MeFBSE						41.8722						29.5102				17.4531	15.9447	25.0927	166.297
EtFBSE
8:2 FTAoc
10:2 FTAoc																	10.0019
PCBTF
Total PFAS	363.785	5356.66	2189.56	1175.88	648.959	2186.71	1339.57	1147.89	5098.27	886.215	691.275	1173.27	692.519	3197.01	654.451	468.81	645.49	698.326	6090.52

## Sheet: Hydrolysis-Table S14
Hydrolysis, ng/g	Floor-1	Floor-2	Bench-2	Floor-3	Bench-3	Floor-4	Floor-5	Floor-6	Floor-7	Bin-3	Bin-4	Bin-5	Bench-4	Floor-8	Floor-9	Composite
Sample Type	Floor	Floor	Bench	Floor	Bench	Floor	Floor	Floor	Floor	Bin	Bin	Bin	Bench	Floor	Floor	Composite
4:2 FTOH
6:2 FTOH	1017.31	779.782	5451.54	1093.09	1002.45	2458.23	1095.26	433.116	1079.66	743.698	5154.73	237.011	295.925	834.002	1016.6	1836.96
8:2 FTOH	2196.6	1329.79	6658.04	3146.29	39962.7	5962.82	1759.34	1666.94	2601.75	1283.19	7106.78	557.031	1363.65	1090.77	1290.08	11287.8
10:2 FTOH	1376.26	1252.8	4395.69	2119.95	34231.9	4029.34	1333.58	776.054	1947.75	879.992	4070.35	350.496	546.414	605.813	665.723	2016.52
6:2 FTAcr
8:2 FTAcr
10:2 FTAcr
6:2 FTMAcr
8:2 FTMAcr
MeFOSE	92.0928	79.5266	417.714	90.7324	161.838	206.194	124.671	107.867	157.558	81.0017	320.062	19.9244	67.169	92.32	99.7108	234.437
EtFOSE	89.0326	100.554	134.89	62.1118	146.629	133.054		122.928	141.083	86.7101	240.981		66.5976	56.8884	61.2299	140.024
MeFBSE	298.949	237.075	2290.98	427.414	297.242	1236.41	235.969	381.267	1826.71	184.751	1272.1	55.5794	290.109	294.061	359.94	1612.16
EtFBSE
8:2 FTOAc
10:2 FTOAc
PCBTF		4392.17
Total PFAS, ng/g	5070.25	8171.69	19348.9	6939.58	75802.7	14026	4548.83	3488.17	7754.52	3259.34	18165	1220.04	2629.86	2973.86	3493.29	17127.9

## Sheet: dTOP-Table S15
dTOP, ng/g	Floor-1	Floor-2	Bench-2	Floor-3	Bench-3	Floor-4	Floor-5	Floor-6	Floor-7	Bin-3	Bin-4	Bin-5	Bench-4	Floor-8	Floor-9	Composite
Sample Type	Floor	Floor	Bench	Floor	Bench	Floor	Floor	Floor	Floor	Bin	Bin	Bin	Bench	Floor	Floor	Composite
PFCAs
TFA			407.792	105.68		419.77		390.284	267.021	517.927	335.46	160.451			135.584	1456.88
PFPrA			418.652	135.068	37.4706	364.305			222.547		552.542	37.4662	40.9845		83.2425	498.354
PFBA			1670.03	722.569		865.517	267.06		1297.77	110.719	2681.78	64.9323	189.434	236.805	250.121	768.672
PFPeA	419.565	195.823	800.528	429.801	248.149	848.134	173.624	188.964	227.223	92.1564	1541.65	58.3201	80.8542	110.695	119.843	464.929
PFHxA	386.965	177.531	424.69	294.346	248.847	509.713	150.039	144.499	177.57	70.9751	1482.35	60.8432	69.4711	75.3094	84.2039	492.514
PFHpA	267.944	155.5	449.941	317.069	190.617	309.024	115.664	126.176	178.022	68.7853	1270.54	53.6565	86.0649	82.9536	82.9276	853.504
PFOA	311.956	149.275	387.869	233.329	264.642	166.235	104.554	138.585	307.73	107.45	1024.32	33.5428	111.177	91.9872	99.6062	686.115
PFNA	111.111	54.8182	187.815	116.777	61.0426	122.585	42.3925	67.8235	78.0657	26.4407	388.462	13.4116	27.7565	21.9393	29.3207	116.649
P4MOA+ P7MOA																41.7348
P355TMHxA
PFDA	241.718	90.5677	184.283	124.657	127.9	104.873	44.4433		60.3157	21.0314	723.893	21.2786	21.3942	21.0693	31.6952	123.548
P37DMOA
PFUdA
PFDoA
PFTrDA
PFTeDA
PFHxDA
PFSAs
TFMS	18.0556	31.9545	5.69748	10.5385	29.7021	11.2195	21.6449	13.3235	9.76642	26.4463	34.7692	144.143	7.13961	41.5821	36.8103	161.674
PFEtS
PFPrS
PFBS	101.5	48.5455	324.807	108.769	83.4894	205.805	35.5981	46.6471	134.314	22.3898	674	18.8163	24.8636	39.4286	52	214.236
PFPeS
PFHxS		19.1818	16.4202	13.6538	10.5532	12.2378	5.64486	19.1471	18.9854	17.209		2.42177	4.0487	10.5536	9.34138	14.4493
PFHpS
PFOS		47.1591	41.8908	35.3077	34.5319	33.25	44.215		89.3869	33.5141	128	6.95918	11.1818	18.025	22.9069	103.076
P3MHpS+P6MHpS
PFNS
P7MOS
PFDS
8Cl-PFOS
FTSs
4:2 FTS
6:2 FTS
8:2 FTS
10:2 FTS
FTUAs
FHUEA			4.23084	2.45124		8.02396							0.337411
FOUEA
FDUEA
FTAs
FPrPA
FPePA
FHpPA
FOPA
FDEA
FHEA
FOEA
FASAs
FBSA			63.2689	25.4615		27.0122			49.6934				11.3506	16.0929	18.5103	52.3043
FHxSA
FOSA															3.55517	26.1522
MeFOSA
EtFOSA
FOSAAs
FOSAA
N-EtFOSAA
N-MeFOSAA
Ether
6-2_Cl_PFESA
8-2_Cl_PFESA
PFECHS
PFEESA
ADONA
GenX
HFPO-TA
NFDHA
PFMPA
PFMBA
PFPis
6:6PFPiA
6:8PFPiA
8:8PFPiA
PFAPA
PFHxPA
PFOPA
PFDPA
PAPs
6-2_PAP
8-2_PAP
6-2_diPAP
6-2-8-2_diPAP
8-2_diPAP
10-2_diPAP
SAmPAP
diSAmPAP
6-2_triPAP
Neutral PFAS
4:2 FTOH
6:2 FTOH
8:2 FTOH
10:2 FTOH
6:2 FTAcr
8:2 FTAcr
10:2 FTAcr
6:2 FTMAcr
8:2 FTMAcr
MeFOSE
EtFOSE
MeFBSE
EtFBSE
8:2 FTAoc
10:2 FTAoc
PCBTF
Total PFAS	1858.81	970.355	5387.91	2675.48	1336.95	4007.71	1004.88	1135.45	3118.41	1115.04	10837.8	676.243	686.058	766.442	1059.67	6074.79
